# Supplementary material
Source: PubMed Central journal article supplement (PMC7497472)
Supplement: id0c00223_si_001.pdf [file id0c00223_si_001.pdf]

Supporting Information

**A semi-synthetic kanglemycin shows *in vivo* efficacy against high-burden rifampicin resistant pathogens**

**Authors:** James Peek<sup>1</sup>, Jiayi Xu<sup>2</sup>, Han Wang<sup>3</sup>, Shraddha Suryavanshi<sup>4</sup>, Matthew Zimmerman<sup>3</sup>, Riccardo Russo<sup>4</sup>, Steven Park<sup>5</sup>, David S. Perlin<sup>5</sup>, and Sean F. Brady<sup>1\*</sup>

**Author affiliations:** <sup>1</sup>Laboratory of Genetically Encoded Small Molecules, The Rockefeller University, 1230 York Avenue, New York, NY 10065. <sup>2</sup>Tri-Institutional Therapeutics Discovery Institute, Belfer Research Building, 413 E 69<sup>th</sup> Street, New York, NY, 10021. <sup>3</sup>Center for Discovery and Innovation, Hackensack Meridian Health, 340 Kingsland Street, Nutley, NJ 07110. <sup>4</sup>Rutgers, the State University of New Jersey, International Center for Public Health, 225 Warren Street, Newark, NJ 07103. <sup>5</sup>Center for Discovery and Innovation, Hackensack Meridian Health, 111 Ideation Way, Nutley, NJ 07110.

**\*Corresponding Author:** Sean F. Brady

**Contact:** Laboratory of Genetically Encoded Small Molecules

The Rockefeller University

1230 York Avenue

New York, NY 10065

**Phone:** 212-327-8280

**Fax:** 212-327-8281

**Email:** [sbrady@rockefeller.edu](mailto:sbrady@rockefeller.edu)

## Table of Contents

1. Table S1. Pharmacokinetic properties of Kang A, J4, and KZ
2. Table S2. Comparison of bacterial burdens in mouse kidneys infected with MRSA strain COL following treatment with Kang A, J4, KZ, or Rif
3. Figure S1. Complete collection of aliphatic amines used in the synthesis of Kang amides
4. Figure S2. Complete collection of cyclic amines used in the synthesis of Kang amides
5. Figure S3. Complete collection of aromatic amines used in the synthesis of Kang amides
6. Figure S4. Complete collection of carboxylic acid amines used in the synthesis of Kang amides
7. Figure S5. Complete collection of phosphate mimic amines used in the synthesis of Kang amides
8. Figure S6. Complete collection of sugar amines used in the synthesis of Kang amides
9. Figure S7. Complete collection of Phe/Trp/Try/His analogue amines used in the synthesis of Kang amides
10. Figure S8. Complete collection of amines uses in the synthesis C-3/C-4 Kang derivatives
11. Table S3. Comparison of bacterial burdens in mouse kidneys infected with *S. aureus* ATCC 12600 carrying an S486L RNAP mutation following treatment with KZ or Rif
12. Figure S9. Calibration curve used to determine the concentration of Kang amides
13. Figure S10. UPLC traces and UV spectra of purified Kang A, J4, and KZ
14. Figure S11. Mass fragmentation analysis of Kang A, J4, and KZ
15. Figure S12. HRMS and NMR data used to verify the structures of J4 and KZ
16. Table S4.  $^1\text{H}$  and  $^{13}\text{C}$  chemical shifts of Kang A, J4, and KZ
17. Figure S13.  $^1\text{H}$  NMR spectrum of Kang A in  $\text{CD}_2\text{Cl}_2$
18. Figure S14.  $^{13}\text{C}$  NMR spectrum of Kang A in  $\text{CD}_2\text{Cl}_2$
19. Figure S15. HMQC spectrum of Kang A in  $\text{CD}_2\text{Cl}_2$
20. Figure S16. HMBC spectrum of Kang A in  $\text{CD}_2\text{Cl}_2$
21. Figure S17. COSY spectrum of Kang A in  $\text{CD}_2\text{Cl}_2$
22. Figure S18.  $^1\text{H}$  NMR spectrum of J4 in  $\text{CDCl}_3$
23. Figure S19.  $^{13}\text{C}$  NMR spectrum of J4 in  $\text{CDCl}_3$
24. Figure S20. HSQC NMR spectrum of J4 in  $\text{CDCl}_3$
25. Figure S21. HMBC NMR spectrum of J4 in  $\text{CDCl}_3$

26. Figure S22. COSY NMR spectrum of J4 in CDCl<sub>3</sub>
27. Figure S23. <sup>1</sup>H NMR spectrum of KZ in DMSO-d<sub>6</sub>
28. Figure S24. <sup>13</sup>C NMR spectrum of KZ in DMSO-d<sub>6</sub>
29. Figure S25. HSQC NMR spectrum of KZ in DMSO-d<sub>6</sub>
30. Figure S26. HMBC NMR spectrum of KZ in DMSO-d<sub>6</sub>
31. Figure S27. COSY NMR spectrum of KZ in DMSO-d<sub>6</sub>

**Table S1.** Pharmacokinetic properties of Kang A, J4, and KZ. NA, not applicable; BLQ, below limit of quantification.

|                                   | IV    | PO   | IP    |
|-----------------------------------|-------|------|-------|
| <b>Kang A</b>                     |       |      |       |
| Dose (mg/kg)                      | 5     | 5    | 5     |
| AUC-inf (hr*ng/mL)                | 10320 | BLQ  | 706   |
| Dose corrected AUG                | 2064  | BLQ  | 141   |
| Bioavailability (%)               | NA    | BLQ  | 6.84  |
| Half-life (hr)                    | 0.84  | NA   | NA    |
| k elimination (hr <sup>-1</sup> ) | 0.72  | NA   | NA    |
| Vol. distribution (L/kg)          | 0.67  | NA   | NA    |
| Clearance (mL/kg*hr)              | 487   | NA   | NA    |
| <b>J4</b>                         |       |      |       |
| Dose (mg/kg)                      | 5     | 5    | 5     |
| AUC-inf (hr*ng/mL)                | 7762  | 48.7 | 3007  |
| Dose corrected AUG                | 1552  | 9.73 | 601   |
| Bioavailability (%)               | NA    | 0.63 | 38.7  |
| Half-life (hr)                    | 1.09  | NA   | NA    |
| k elimination (hr <sup>-1</sup> ) | 0.51  | NA   | NA    |
| Vol. distribution (L/kg)          | 1.28  | NA   | NA    |
| Clearance (mL/kg*hr)              | 651   | NA   | NA    |
| <b>KZ</b>                         |       |      |       |
| Dose (mg/kg)                      | 5     | 5    | 5     |
| AUC-inf (hr*ng/mL)                | 54150 | 2923 | 14843 |
| Dose corrected AUG                | 10830 | 585  | 2969  |
| Bioavailability (%)               | NA    | 5.4  | 27.4  |
| Half-life (hr)                    | 1.17  | NA   | NA    |
| k elimination (hr <sup>-1</sup> ) | 0.55  | NA   | NA    |
| Vol. distribution (L/kg)          | 0.17  | NA   | NA    |
| Clearance (mL/kg*hr)              | 94.0  | NA   | NA    |

**Table S2.** Comparison of bacterial burdens in mouse kidneys infected with MRSA strain COL following treatment with Kang A, J4, KZ or Rif. Efficacy of compounds was evaluated in a neutropenic murine acute peritonitis/septicemia model. Infected mice received IP injections of drug (15 mg/mL) or vehicle (5% DMA plus 30% Captisol) at 2, 4 and 8 hours post infection. Bacterial burdens in kidneys were determined at 24 hrs post-infection. Limit of detection for burden quantification was calculated as 100 CFU/g of kidney. Log change in burden was calculated relative to the vehicle treated group.

| Treatment                                             | Mice | Average log CFU/g kidney | Average/Group | Log change in burden |
|-------------------------------------------------------|------|--------------------------|---------------|----------------------|
| <b>Vehicle<br/>(5% DMA<br/>plus 30%<br/>Captisol)</b> | 1    | 5.2                      | 5.6           | 0.0                  |
|                                                       | 2    | 6.1                      |               |                      |
|                                                       | 3    | 5.9                      |               |                      |
|                                                       | 4    | 5.5                      |               |                      |
|                                                       | 5    | 5.6                      |               |                      |
|                                                       | 6    | 5.1                      |               |                      |
| <b>Kang A<br/>(15 mg/kg)</b>                          | 1    | 3.8                      | 3.8           | -1.8                 |
|                                                       | 2    | 4.1                      |               |                      |
|                                                       | 3    | 4.1                      |               |                      |
|                                                       | 4    | 3.8                      |               |                      |
|                                                       | 5    | 2.6                      |               |                      |
|                                                       | 6    | 4.6                      |               |                      |
| <b>J4<br/>(15 mg/kg)</b>                              | 1    | 2.6                      | 4.1           | -1.5                 |
|                                                       | 2    | 4.7                      |               |                      |
|                                                       | 3    | 3.8                      |               |                      |
|                                                       | 4    | 5.0                      |               |                      |
|                                                       | 5    | 4.0                      |               |                      |
|                                                       | 6    | 4.7                      |               |                      |
| <b>KZ<br/>(15 mg/kg)</b>                              | 1    | sterilized               | 0.0           | -5.6                 |
|                                                       | 2    |                          |               |                      |
|                                                       | 3    |                          |               |                      |
|                                                       | 4    |                          |               |                      |
|                                                       | 5    |                          |               |                      |
|                                                       | 6    |                          |               |                      |
| <b>Rif<br/>(15 mg/kg)</b>                             | 1    | sterilized               | 0.0           | -5.6                 |
|                                                       | 2    |                          |               |                      |
|                                                       | 3    |                          |               |                      |
|                                                       | 4    |                          |               |                      |
|                                                       | 5    |                          |               |                      |
|                                                       | 6    |                          |               |                      |

|                                          |                                                                                   |                                                                                   |                                                                                   |                                                                                   |                                                                                    |                                                                                     |                                                                                     |
|------------------------------------------|-----------------------------------------------------------------------------------|-----------------------------------------------------------------------------------|-----------------------------------------------------------------------------------|-----------------------------------------------------------------------------------|------------------------------------------------------------------------------------|-------------------------------------------------------------------------------------|-------------------------------------------------------------------------------------|
|                                          | 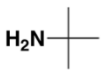 |  |  |  |  |  |  |
|                                          | <b>J5</b>                                                                         | <b>C10</b>                                                                        | <b>D4</b>                                                                         | <b>E4</b>                                                                         | <b>N1</b>                                                                          | <b>C23</b>                                                                          | <b>E3</b>                                                                           |
| <b>Expected mass (M - H<sup>+</sup>)</b> | 1035.5                                                                            | 1035.5                                                                            | 1007.4                                                                            | 1079.5                                                                            | 1041.4                                                                             | 993.4                                                                               | 1065.4                                                                              |
| <b>Experimental mass</b>                 | 1035.5                                                                            | 1035.5                                                                            | 1007.4                                                                            | 1079.5                                                                            | 1041.4                                                                             | 993.4                                                                               | 1065.4                                                                              |
| <b>WT</b>                                | 0.000061                                                                          | 0.0039                                                                            | 0.0039                                                                            | 0.0039                                                                            | 0.0039                                                                             | 0.016                                                                               | 0.016                                                                               |
| <b>H481Y</b>                             | >64                                                                               | >64                                                                               | >64                                                                               | >64                                                                               | >64                                                                                | >64                                                                                 | >64                                                                                 |
| <b>S486L</b>                             | 16                                                                                | 16                                                                                | 4                                                                                 | 64                                                                                | 16                                                                                 | 16                                                                                  | 16                                                                                  |
|                                          |  |  |  |  |  |  |  |
|                                          | <b>J2</b>                                                                         | <b>N36</b>                                                                        | <b>D2</b>                                                                         | <b>E1</b>                                                                         | <b>E2</b>                                                                          | <b>J6</b>                                                                           | <b>N7</b>                                                                           |
| <b>Expected mass (M - H<sup>+</sup>)</b> | 1065.4                                                                            | 1025.4                                                                            | 1049.5                                                                            | 1009.4                                                                            | 1051.4                                                                             | 1065.4                                                                              | 1079.5                                                                              |
| <b>Experimental mass</b>                 | 1065.4                                                                            | 1025.4                                                                            | 1049.5                                                                            | 1009.4                                                                            | 1051.4                                                                             | 1065.4                                                                              | 1079.5                                                                              |
| <b>WT</b>                                | 0.016                                                                             | 0.016                                                                             | 0.063                                                                             | 0.063                                                                             | 0.063                                                                              | 0.063                                                                               | 0.063                                                                               |
| <b>H481Y</b>                             | 64                                                                                | 64                                                                                | >64                                                                               | >64                                                                               | >64                                                                                | >64                                                                                 | >64                                                                                 |
| <b>S486L</b>                             | 4                                                                                 | 4                                                                                 | 16                                                                                | 16                                                                                | 16                                                                                 | 16                                                                                  | 16                                                                                  |
|                                          |  |  |  |  |  |                                                                                     |                                                                                     |
|                                          | <b>G1</b>                                                                         | <b>G2</b>                                                                         | <b>G3</b>                                                                         | <b>J1</b>                                                                         | <b>G5</b>                                                                          |                                                                                     |                                                                                     |
| <b>Expected mass (M - H<sup>+</sup>)</b> | 1037.5                                                                            | 1051.5                                                                            | 1065.5                                                                            | 1023.4                                                                            | 1083.5                                                                             |                                                                                     |                                                                                     |
| <b>Experimental mass</b>                 | 1037.5                                                                            | 1051.5                                                                            | 1065.5                                                                            | 1023.4                                                                            | 1083.5                                                                             |                                                                                     |                                                                                     |
| <b>WT</b>                                | 1                                                                                 | 1                                                                                 | 1                                                                                 | 1                                                                                 | 16                                                                                 |                                                                                     |                                                                                     |
| <b>H481Y</b>                             | >64                                                                               | >64                                                                               | >64                                                                               | >64                                                                               | >64                                                                                |                                                                                     |                                                                                     |
| <b>S486L</b>                             | 64                                                                                | 64                                                                                | 64                                                                                | >64                                                                               | >64                                                                                |                                                                                     |                                                                                     |

  

| Round 2: J5 subscreen                    |                                                                                     |                                                                                     |                                                                                     |                                                                                     |                                                                                      |                                                                                       |                                                                                       |
|------------------------------------------|-------------------------------------------------------------------------------------|-------------------------------------------------------------------------------------|-------------------------------------------------------------------------------------|-------------------------------------------------------------------------------------|--------------------------------------------------------------------------------------|---------------------------------------------------------------------------------------|---------------------------------------------------------------------------------------|
|                                          |  |  |  |  |  |  |  |
|                                          | <b>N6</b>                                                                           | <b>N39</b>                                                                          | <b>N40</b>                                                                          | <b>N41</b>                                                                          | <b>N43</b>                                                                           | <b>N42</b>                                                                            | <b>N44</b>                                                                            |
| <b>Expected mass (M - H<sup>+</sup>)</b> | 1063.5                                                                              | 1049.5                                                                              | 1091.5                                                                              | 1051.5                                                                              | 1097.5                                                                               | 1051.5                                                                                | 1141.5                                                                                |
| <b>Experimental mass</b>                 | 1063.5                                                                              | 1049.5                                                                              | 1091.5                                                                              | 1051.5                                                                              | 1097.5                                                                               | 1051.5                                                                                | 1141.5                                                                                |
| <b>WT</b>                                | 0.063                                                                               | 0.063                                                                               | 0.063                                                                               | 0.063                                                                               | 0.25                                                                                 | 1                                                                                     | 1                                                                                     |
| <b>H481Y</b>                             | >64                                                                                 | >64                                                                                 | >64                                                                                 | >64                                                                                 | >64                                                                                  | >64                                                                                   | >64                                                                                   |
| <b>S486L</b>                             | 4                                                                                   | 4                                                                                   | 4                                                                                   | 4                                                                                   | 16                                                                                   | 64                                                                                    | 64                                                                                    |

**Figure S1.** Complete collection of aliphatic amines used in the synthesis of Kang amides. Aliphatic amines were screened over two rounds of synthesis. The first round of synthesis broadly sampled this class of amines, while the second round utilized amines structurally related to J5, which yielded the most potent amide in the initial round of screening. The identity of each synthesized amide was verified by LC/MS. Expected and experimental masses are indicated. MIC values ( $\mu\text{g}/\text{mL}$ ) are shown for the amides generated from each amine against wild-type and rifampicin resistant (H481Y and S486L) *S. aureus* strains.

|                                     |  |  |  |  |  |  |  |
|-------------------------------------|-----------------------------------------------------------------------------------|-----------------------------------------------------------------------------------|-----------------------------------------------------------------------------------|-----------------------------------------------------------------------------------|------------------------------------------------------------------------------------|-------------------------------------------------------------------------------------|-------------------------------------------------------------------------------------|
|                                     | N29                                                                               | B1                                                                                | C11                                                                               | J7                                                                                | B4                                                                                 | C4                                                                                  | C9                                                                                  |
| Expected mass (M - H <sup>+</sup> ) | 1047.5                                                                            | 1033.5                                                                            | 1061.5                                                                            | 1033.5                                                                            | 1063.5                                                                             | 1049.5                                                                              | 1019.4                                                                              |
| Experimental mass                   | 1047.5                                                                            | 1033.5                                                                            | 1061.5                                                                            | 1033.5                                                                            | 1063.5                                                                             | 1049.5                                                                              | 1019.4                                                                              |
| WT                                  | 0.00098                                                                           | 0.00098                                                                           | 0.0039                                                                            | 0.0039                                                                            | 0.016                                                                              | 0.016                                                                               | 0.016                                                                               |
| H481Y                               | >64                                                                               | >64                                                                               | >64                                                                               | >64                                                                               | 64                                                                                 | >64                                                                                 | >64                                                                                 |
| S486L                               | 4                                                                                 | 16                                                                                | 64                                                                                | 16                                                                                | 4                                                                                  | 16                                                                                  | 16                                                                                  |

  

|                                     |  |  |  |  |  |  |  |
|-------------------------------------|-----------------------------------------------------------------------------------|-----------------------------------------------------------------------------------|-----------------------------------------------------------------------------------|-----------------------------------------------------------------------------------|------------------------------------------------------------------------------------|-------------------------------------------------------------------------------------|-------------------------------------------------------------------------------------|
|                                     | B3                                                                                | C20                                                                               | B2                                                                                | C12                                                                               | N9                                                                                 | N10                                                                                 | N11                                                                                 |
| Expected mass (M - H <sup>+</sup> ) | 1063.5                                                                            | 1063.4                                                                            | 1077.5                                                                            | 1063.5                                                                            | 1087.5                                                                             | 1104.5                                                                              | 1106.5                                                                              |
| Experimental mass                   | 1063.5                                                                            | 1063.4                                                                            | 1077.5                                                                            | 1063.5                                                                            | 1087.5                                                                             | 1104.5                                                                              | 1106.5                                                                              |
| WT                                  | 0.063                                                                             | 0.063                                                                             | 1                                                                                 | 1                                                                                 | 1                                                                                  | 1                                                                                   | 1                                                                                   |
| H481Y                               | 64                                                                                | >64                                                                               | >64                                                                               | >64                                                                               | >64                                                                                | >64                                                                                 | >64                                                                                 |
| S486L                               | 4                                                                                 | 16                                                                                | 64                                                                                | 64                                                                                | 16                                                                                 | 64                                                                                  | >64                                                                                 |

Round 2: N29 subcreen

|                                     | 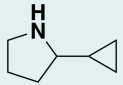 |  |  |  |  |
|-------------------------------------|-------------------------------------------------------------------------------------|-------------------------------------------------------------------------------------|-------------------------------------------------------------------------------------|-------------------------------------------------------------------------------------|--------------------------------------------------------------------------------------|
|                                     | C5                                                                                  | C6                                                                                  | N28                                                                                 | C7                                                                                  | C8                                                                                   |
| Expected mass (M - H <sup>+</sup> ) | 1073.5                                                                              | 1087.5                                                                              | 1033.5                                                                              | 1115.5                                                                              | 1125.5                                                                               |
| Experimental mass                   | 1073.5                                                                              | 1087.5                                                                              | 1033.5                                                                              | 1115.5                                                                              | 1125.5                                                                               |
| WT                                  | 0.00024                                                                             | 0.016                                                                               | 0.016                                                                               | 0.25                                                                                | 0.25                                                                                 |
| H481Y                               | >64                                                                                 | >64                                                                                 | >64                                                                                 | >64                                                                                 | >64                                                                                  |
| S486L                               | 16                                                                                  | 16                                                                                  | 16                                                                                  | 64                                                                                  | 16                                                                                   |

**Figure S2.** Complete collection of cyclic amines used in the synthesis of Kang amides. Cyclic amines were screened over two rounds of synthesis. The first round of synthesis broadly sampled this class of amines, while the second round utilized amines structurally related to N29, which yielded one of the most potent amides in the initial round of screening. The identity of each synthesized amide was verified by LC/MS. Expected and experimental masses are indicated. MIC values ( $\mu\text{g}/\text{mL}$ ) are shown for the amides generated from each amine against wild-type and rifampicin resistant (H481Y and S486L) *S. aureus* strains.

|                                     | 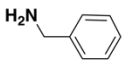 |  |  |  |  |  |  |
|-------------------------------------|-----------------------------------------------------------------------------------|-----------------------------------------------------------------------------------|-----------------------------------------------------------------------------------|-----------------------------------------------------------------------------------|------------------------------------------------------------------------------------|-------------------------------------------------------------------------------------|-------------------------------------------------------------------------------------|
|                                     | J4                                                                                | F5                                                                                | F6                                                                                | A1                                                                                | A2                                                                                 | F4                                                                                  | N33                                                                                 |
| Expected mass (M - H <sup>+</sup> ) | 1069.5 <sup>a</sup>                                                               | 1115.5                                                                            | 1113.4                                                                            | 1055.4                                                                            | 1069.5                                                                             | 1115.5                                                                              | 1095.5                                                                              |
| Experimental mass                   | 1069.5                                                                            | 1115.5                                                                            | 1113.4                                                                            | 1055.4                                                                            | 1069.5                                                                             | 1115.5                                                                              | 1095.5                                                                              |
| WT                                  | 0.000061                                                                          | 0.0039                                                                            | 0.0039                                                                            | 0.016                                                                             | 0.016                                                                              | 0.063                                                                               | 0.063                                                                               |
| H481Y                               | >64                                                                               | >64                                                                               | 64                                                                                | >64                                                                               | 64                                                                                 | >64                                                                                 | >64                                                                                 |
| S486L                               | 16                                                                                | 16                                                                                | 4                                                                                 | 4                                                                                 | 16                                                                                 | 16                                                                                  | 16                                                                                  |

|                                     | 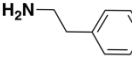 |  |  |  |  |  |  |
|-------------------------------------|-----------------------------------------------------------------------------------|-----------------------------------------------------------------------------------|-----------------------------------------------------------------------------------|-----------------------------------------------------------------------------------|------------------------------------------------------------------------------------|-------------------------------------------------------------------------------------|-------------------------------------------------------------------------------------|
|                                     | C22                                                                               | F3                                                                                | N3                                                                                | N8                                                                                | A3                                                                                 | N5                                                                                  | C21                                                                                 |
| Expected mass (M - H <sup>+</sup> ) | 1083.5                                                                            | 1115.5                                                                            | 1123.4                                                                            | 1111.5                                                                            | 1071.4                                                                             | 1146.4                                                                              | 1119.5                                                                              |
| Experimental mass                   | 1083.5                                                                            | 1115.5                                                                            | 1123.4                                                                            | 1111.5                                                                            | 1071.4                                                                             | 1146.4                                                                              | 1119.5                                                                              |
| WT                                  | 0.25                                                                              | 0.25                                                                              | 0.25                                                                              | 0.25                                                                              | 1                                                                                  | 1                                                                                   | 4                                                                                   |
| H481Y                               | >64                                                                               | >64                                                                               | >64                                                                               | >64                                                                               | >64                                                                                | >64                                                                                 | >64                                                                                 |
| S486L                               | 16                                                                                | 4                                                                                 | 16                                                                                | 16                                                                                | 64                                                                                 | >64                                                                                 | >64                                                                                 |

|                                     | 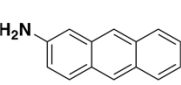 |  |
|-------------------------------------|-----------------------------------------------------------------------------------|------------------------------------------------------------------------------------|
|                                     | N34                                                                               | N35                                                                                |
| Expected mass (M - H <sup>+</sup> ) | 1155.5                                                                            | 1195.5                                                                             |
| Experimental mass                   | 1159.5                                                                            | 1196.5                                                                             |
| WT                                  | 4                                                                                 | 4                                                                                  |
| H481Y                               | >64                                                                               | >64                                                                                |
| S486L                               | >64                                                                               | >64                                                                                |

#### Round 2: J4 subscreen

|                                     | 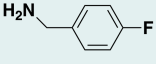 |  |  |  |  |
|-------------------------------------|-------------------------------------------------------------------------------------|-------------------------------------------------------------------------------------|-------------------------------------------------------------------------------------|-------------------------------------------------------------------------------------|--------------------------------------------------------------------------------------|
|                                     | N4                                                                                  | C13                                                                                 | F1                                                                                  | F2                                                                                  | N2                                                                                   |
| Expected mass (M - H <sup>+</sup> ) | 1087.4                                                                              | 1129.5                                                                              | 1099.5                                                                              | 1099.5                                                                              | 1103.4                                                                               |
| Experimental mass                   | 1087.4                                                                              | 1129.5                                                                              | 1099.5                                                                              | 1099.5                                                                              | 1103.4                                                                               |
| WT                                  | 0.000061                                                                            | 0.0039                                                                              | 0.0039                                                                              | 0.0039                                                                              | 0.063                                                                                |
| H481Y                               | >64                                                                                 | >64                                                                                 | >64                                                                                 | >64                                                                                 | >64                                                                                  |
| S486L                               | 16                                                                                  | 64                                                                                  | 64                                                                                  | 64                                                                                  | 4                                                                                    |

**Figure S3.** Complete collection of aromatic amines used in the synthesis of Kang amides. Aromatic amines were screened over two rounds of synthesis. The first round of synthesis broadly sampled this class of amines, while the second round utilized amines structurally related to J4, which yielded the most potent amide in the initial round of screening. The identity of each synthesized amide was verified by LC/MS. Expected and experimental masses are indicated. <sup>a</sup>The identity of J4, a lead compound for *in vivo* studies, was further verified by HRMS using a SCIEX X500B Q-TOF system: calcd *m/z* for C<sub>57</sub>H<sub>71</sub>N<sub>2</sub>O<sub>18</sub> (M + H<sup>+</sup>) 1071.4696, found *m/z* 1071.4654. MIC values (μg/mL) are shown for the amides generated from each amine against wild-type and rifampicin resistant (H481Y and S486L) *S. aureus* strains.



|                                          |                                                                                   |                                                                                   |                                                                                   |                                                                                   |                                                                                     |                                                                                     |                                                                                     |
|------------------------------------------|-----------------------------------------------------------------------------------|-----------------------------------------------------------------------------------|-----------------------------------------------------------------------------------|-----------------------------------------------------------------------------------|-------------------------------------------------------------------------------------|-------------------------------------------------------------------------------------|-------------------------------------------------------------------------------------|
|                                          | 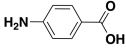 |  |  |  |  |  |  |
|                                          | <b>N12</b>                                                                        | <b>N17</b>                                                                        | <b>N22</b>                                                                        | <b>N13</b>                                                                        | <b>N14</b>                                                                          | <b>N18</b>                                                                          | <b>N20</b>                                                                          |
| <b>Expected mass (M - H<sup>+</sup>)</b> | 1099.4                                                                            | 1121.5                                                                            | 1242.5                                                                            | 1113.4                                                                            | 1037.4                                                                              | 1137.5                                                                              | 1156.5                                                                              |
| <b>Experimental mass</b>                 | 1099.4                                                                            | 1121.5                                                                            | 1242.5                                                                            | 1113.4                                                                            | 1037.4                                                                              | 1137.5                                                                              | 1156.5                                                                              |
| <b>WT</b>                                | 1                                                                                 | 1                                                                                 | 1                                                                                 | 4                                                                                 | 4                                                                                   | 4                                                                                   | 4                                                                                   |
| <b>H481Y</b>                             | >64                                                                               | >64                                                                               | >64                                                                               | >64                                                                               | >64                                                                                 | >64                                                                                 | >64                                                                                 |
| <b>S486L</b>                             | 16                                                                                | >64                                                                               | >64                                                                               | >64                                                                               | >64                                                                                 | >64                                                                                 | >64                                                                                 |
|                                          |  |  |  |  |  |  |                                                                                     |
|                                          | <b>N21</b>                                                                        | <b>N23</b>                                                                        | <b>N26</b>                                                                        | <b>N27</b>                                                                        | <b>N15</b>                                                                          | <b>N16</b>                                                                          |                                                                                     |
| <b>Expected mass (M - H<sup>+</sup>)</b> | 1143.4                                                                            | 1200.5                                                                            | 1125.5                                                                            | 1133.5                                                                            | 1065.4                                                                              | 1093.5                                                                              |                                                                                     |
| <b>Experimental mass</b>                 | 1143.4                                                                            | 1200.5                                                                            | 1125.5                                                                            | 1133.5                                                                            | 1065.4                                                                              | 1093.5                                                                              |                                                                                     |
| <b>WT</b>                                | 4                                                                                 | 4                                                                                 | 4                                                                                 | 4                                                                                 | 16                                                                                  | 16                                                                                  |                                                                                     |
| <b>H481Y</b>                             | >64                                                                               | >64                                                                               | >64                                                                               | >64                                                                               | >64                                                                                 | >64                                                                                 |                                                                                     |
| <b>S486L</b>                             | 64                                                                                | 64                                                                                | 64                                                                                | >64                                                                               | >64                                                                                 | 64                                                                                  |                                                                                     |

**Figure S4.** Complete collection of carboxylic acid amines used in the synthesis of Kang amides. The identity of each synthesized amide was verified by LC/MS. Expected and experimental masses are indicated. MIC values ( $\mu\text{g/mL}$ ) are shown for the amides generated from each amine against wild-type and rifampicin resistant (H481Y and S486L) *S. aureus* strains.

|                                     | 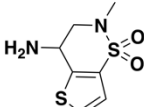 |  |  |  |  |  |  |
|-------------------------------------|-----------------------------------------------------------------------------------|-----------------------------------------------------------------------------------|-----------------------------------------------------------------------------------|-----------------------------------------------------------------------------------|-------------------------------------------------------------------------------------|-------------------------------------------------------------------------------------|-------------------------------------------------------------------------------------|
|                                     | P4                                                                                | P5                                                                                | P6                                                                                | C16                                                                               | P11                                                                                 | P3                                                                                  | P8                                                                                  |
| Expected mass (M - H <sup>+</sup> ) | 1180.4                                                                            | 1112.4                                                                            | 1095.4                                                                            | 1205.5                                                                            | 1087.4                                                                              | 1112.4                                                                              | 1087.4                                                                              |
| Experimental mass                   | 1180.4                                                                            | 1112.4                                                                            | 1095.4                                                                            | 1205.5                                                                            | 1087.4                                                                              | 1112.4                                                                              | 1078.4                                                                              |
| WT                                  | 0.063                                                                             | 0.063                                                                             | 0.25                                                                              | 1                                                                                 | 1                                                                                   | 4                                                                                   | 4                                                                                   |
| H481Y                               | >64                                                                               | >64                                                                               | >64                                                                               | >64                                                                               | >64                                                                                 | >64                                                                                 | >64                                                                                 |
| S486L                               | 16                                                                                | 16                                                                                | 16                                                                                | >64                                                                               | 4                                                                                   | 64                                                                                  | 64                                                                                  |

  

|                                     |  |  |  |  |  |  |
|-------------------------------------|-----------------------------------------------------------------------------------|-----------------------------------------------------------------------------------|-----------------------------------------------------------------------------------|-----------------------------------------------------------------------------------|------------------------------------------------------------------------------------|-------------------------------------------------------------------------------------|
|                                     | P10                                                                               | P7                                                                                | P9                                                                                | P12                                                                               | P13                                                                                | P14                                                                                 |
| Expected mass (M - H <sup>+</sup> ) | 1073.4                                                                            | 1073.4                                                                            | 1101.4                                                                            | 1101.4                                                                            | 1115.4                                                                             | 1149.4                                                                              |
| Experimental mass                   | 1073.4                                                                            | 1073.4                                                                            | 1101.4                                                                            | 1101.4                                                                            | 1115.4                                                                             | 1149.4                                                                              |
| WT                                  | 4                                                                                 | 16                                                                                | 16                                                                                | 16                                                                                | 16                                                                                 | 16                                                                                  |
| H481Y                               | >64                                                                               | >64                                                                               | >64                                                                               | >64                                                                               | >64                                                                                | >64                                                                                 |
| S486L                               | >64                                                                               | >64                                                                               | >64                                                                               | >64                                                                               | >64                                                                                | >64                                                                                 |

**Figure S5.** Complete collection of phosphate mimic amines used in the synthesis of Kang amides. The identity of each synthesized amide was verified by LC/MS. Expected and experimental masses are indicated. MIC values ( $\mu\text{g}/\text{mL}$ ) are shown for the amides generated from each amine against wild-type and rifampicin resistant (H481Y and S486L) *S. aureus* strains.

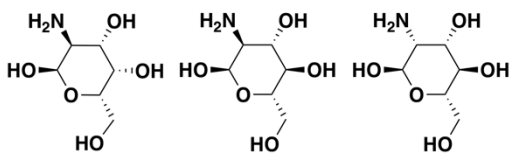

|                                     | C18    | C19    | S1     |
|-------------------------------------|--------|--------|--------|
| Expected mass (M - H <sup>+</sup> ) | 1141.5 | 1141.5 | 1141.5 |
| Experimental mass                   | 1141.5 | 1141.5 | 1141.5 |
| WT                                  | >64    | >64    | >64    |
| H481Y                               | >64    | >64    | >64    |
| S486L                               | >64    | >64    | >64    |

**Figure S6.** Complete collection of sugar amines used in the synthesis of Kang amides. The identity of each synthesized amide was verified by LC/MS. Expected and experimental masses are indicated. MIC values ( $\mu\text{g/mL}$ ) are shown for the amides generated from each amine against wild-type and rifampicin resistant (H481Y and S486L) *S. aureus* strains.

|                                     | 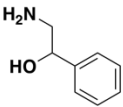 |  |  |  |  |  |  |
|-------------------------------------|-----------------------------------------------------------------------------------|----------------------------------------------------------------------------------|-----------------------------------------------------------------------------------|-----------------------------------------------------------------------------------|------------------------------------------------------------------------------------|-------------------------------------------------------------------------------------|-------------------------------------------------------------------------------------|
|                                     | C17                                                                               | J3                                                                               | A4                                                                                | A5                                                                                | A7                                                                                 | C14                                                                                 | C15                                                                                 |
| Expected mass (M - H <sup>+</sup> ) | 1099.5                                                                            | 1157.5                                                                           | 1099.5                                                                            | 1122.5                                                                            | 1115.5                                                                             | 1131.5                                                                              | 1115.5                                                                              |
| Experimental mass                   | 1099.5                                                                            | 1157.5                                                                           | 1099.5                                                                            | 1122.5                                                                            | 1115.5                                                                             | 1131.5                                                                              | 1115.5                                                                              |
| WT                                  | 0.063                                                                             | 0.063                                                                            | 0.25                                                                              | 0.25                                                                              | 1                                                                                  | 1                                                                                   | 1                                                                                   |
| H481Y                               | >64                                                                               | >64                                                                              | >64                                                                               | >64                                                                               | >64                                                                                | >64                                                                                 | >64                                                                                 |
| S486L                               | 16                                                                                | 16                                                                               | 16                                                                                | 4                                                                                 | 64                                                                                 | >64                                                                                 | 64                                                                                  |

  

|                                     |  |  |  |
|-------------------------------------|-----------------------------------------------------------------------------------|-----------------------------------------------------------------------------------|-----------------------------------------------------------------------------------|
|                                     | P1                                                                                | A6                                                                                | P2                                                                                |
| Expected mass (M - H <sup>+</sup> ) | 1072.5                                                                            | 1138.5                                                                            | 1073.5                                                                            |
| Experimental mass                   | 1072.5                                                                            | 1138.5                                                                            | 1073.5                                                                            |
| WT                                  | 1                                                                                 | 4                                                                                 | 4                                                                                 |
| H481Y                               | >64                                                                               | >64                                                                               | >64                                                                               |
| S486L                               | >64                                                                               | 64                                                                                | >64                                                                               |

**Figure S7.** Complete collection of Phe/Trp/Tyr/His analogue amines used in the synthesis of Kang amides. The identity of each synthesized amide was verified by LC/MS. Expected and experimental masses are indicated. MIC values ( $\mu\text{g/mL}$ ) are shown for the amides generated from each amine against wild-type and rifampicin resistant (H481Y and S486L) *S. aureus* strains.

|                                     |  |  |  |  |  |  |  |
|-------------------------------------|-----------------------------------------------------------------------------------|-----------------------------------------------------------------------------------|-----------------------------------------------------------------------------------|------------------------------------------------------------------------------------|-------------------------------------------------------------------------------------|-------------------------------------------------------------------------------------|-------------------------------------------------------------------------------------|
|                                     | C4z                                                                               | KZ                                                                                | Z6                                                                                | Z8                                                                                 | N28z                                                                                | N29z                                                                                | Z5                                                                                  |
| Expected mass (M - H <sup>+</sup> ) | 1170.5                                                                            | 1225.5 <sup>a</sup>                                                               | 1211.5                                                                            | 1227.5                                                                             | 1154.5                                                                              | 1168.5                                                                              | 1183.5                                                                              |
| Experimental mass                   | 1170.5                                                                            | 1225.5                                                                            | 1211.5                                                                            | 1227.5                                                                             | 1154.5                                                                              | 1168.5                                                                              | 1183.5                                                                              |
| WT                                  | 0.0039                                                                            | 0.0039                                                                            | 0.0039                                                                            | 0.0039                                                                             | 0.016                                                                               | 0.016                                                                               | 0.016                                                                               |
| H481Y                               | >64                                                                               | 16                                                                                | 16                                                                                | >64                                                                                | >64                                                                                 | 64                                                                                  | >64                                                                                 |
| S486L                               | 4                                                                                 | 1                                                                                 | 1                                                                                 | 4                                                                                  | 16                                                                                  | 4                                                                                   | 4                                                                                   |

  

|                                     |  |  |  |  |  |  |
|-------------------------------------|-----------------------------------------------------------------------------------|-----------------------------------------------------------------------------------|-----------------------------------------------------------------------------------|------------------------------------------------------------------------------------|-------------------------------------------------------------------------------------|-------------------------------------------------------------------------------------|
|                                     | Z7                                                                                | Z10                                                                               | Z11                                                                               | N31z                                                                               | Z4                                                                                  | Z9                                                                                  |
| Expected mass (M - H <sup>+</sup> ) | 1245.5                                                                            | 1226.5                                                                            | 1255.6<br>(1096.5) <sup>b</sup>                                                   | 1237.6                                                                             | 1204.5                                                                              | 1240.5                                                                              |
| Experimental mass                   | 1245.5                                                                            | 1226.5                                                                            | 1096.5                                                                            | 1237.6                                                                             | 1204.5                                                                              | 1240.5                                                                              |
| WT                                  | 0.063                                                                             | 0.063                                                                             | 0.063                                                                             | 0.25                                                                               | 0.25                                                                                | 0.25                                                                                |
| H481Y                               | >64                                                                               | 64                                                                                | 64                                                                                | >64                                                                                | >64                                                                                 | >64                                                                                 |
| S486L                               | 16                                                                                | 4                                                                                 | 16                                                                                | 16                                                                                 | 16                                                                                  | 16                                                                                  |

**Figure S8.** Complete collection of amines used in the synthesis of C-3/C-4 Kang derivatives. The identity of each synthesized compound was verified by LC/MS. Expected and experimental masses are indicated. <sup>a</sup>The identity of KZ, a lead compound for *in vivo* studies, was further verified by HRMS using a SCIEX X500B Q-TOF system: calcd *m/z* for C<sub>64</sub>H<sub>83</sub>N<sub>4</sub>O<sub>20</sub> (M + H<sup>+</sup>) 1227.5595, found *m/z* 1227.5561. <sup>b</sup>LC/MS fragment of Z11 detected in positive ion mode (M + H<sup>+</sup>). MIC values (μg/mL) are shown against wild-type and rifampicin resistant (H481Y and S486L) *S. aureus* strains.

**Table S3.** Comparison of bacterial burdens in mouse kidneys infected with *S. aureus* ATCC 12600 carrying an S486L RNAP mutation following treatment with KZ or Rif. Efficacy of compounds was evaluated in a neutropenic murine acute peritonitis/septicemia model. Infected mice received IP injections of drug (15 mg/mL) or vehicle (5% DMA plus 30% Captisol) at 2, 4 and 8 hours post infection. Bacterial burdens in kidneys were determined at 24 hrs post-infection. Limit of detection for burden quantification was calculated as 100 CFU/g of kidney. Log change in burden was calculated relative to the vehicle treated group.

| Treatment                                             | Mice | Average log CFU/g kidney | Average/Group | Log change in burden |
|-------------------------------------------------------|------|--------------------------|---------------|----------------------|
| <b>Vehicle<br/>(5% DMA<br/>plus 30%<br/>Captisol)</b> | 1    | 4.9                      | 5.7           | 0.0                  |
|                                                       | 2    | 6.0                      |               |                      |
|                                                       | 3*   | 5.8                      |               |                      |
|                                                       | 4*   | 5.7                      |               |                      |
|                                                       | 5    | 6.1                      |               |                      |
|                                                       | 6*   | 5.6                      |               |                      |
| <b>KZ<br/>(15 mg/kg)</b>                              | 1    | 3.8                      | 3.8           | -1.9                 |
|                                                       | 2    | 3.6                      |               |                      |
|                                                       | 3    | 4.0                      |               |                      |
|                                                       | 4    | 3.7                      |               |                      |
|                                                       | 5    | 3.9                      |               |                      |
|                                                       | 6    | 4.1                      |               |                      |
| <b>Rif<br/>(15 mg/kg)</b>                             | 1*   | 4.9                      | 5.0           | -0.7                 |
|                                                       | 2*   | 4.9                      |               |                      |
|                                                       | 3*   | 4.9                      |               |                      |
|                                                       | 4*   | 5.0                      |               |                      |
|                                                       | 5*   | 5.1                      |               |                      |
|                                                       | 6    | 5.2                      |               |                      |

\*found dead at  
24 hrs

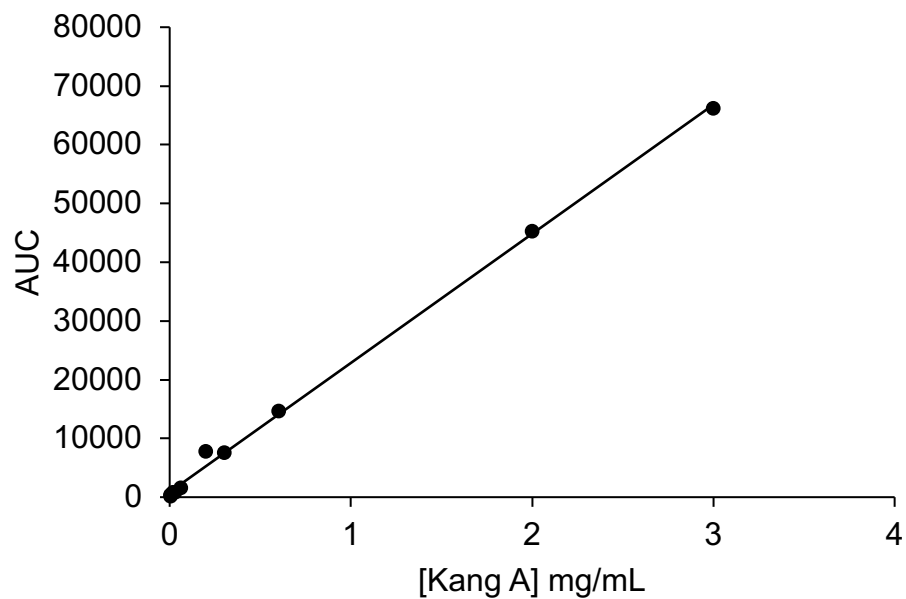

**Figure S9.** Calibration curve used to determine the concentration of Kang amides. Purified synthesized Kang amides were injected on a Waters Acquity H-Class UPLC and the UV absorbance of each compound was monitored at 395 nm. The area under the curve (AUC) for the UV peak corresponding to each compound was compared to the calibration curve shown above to determine the concentration (mg/mL) of each synthesized compound.

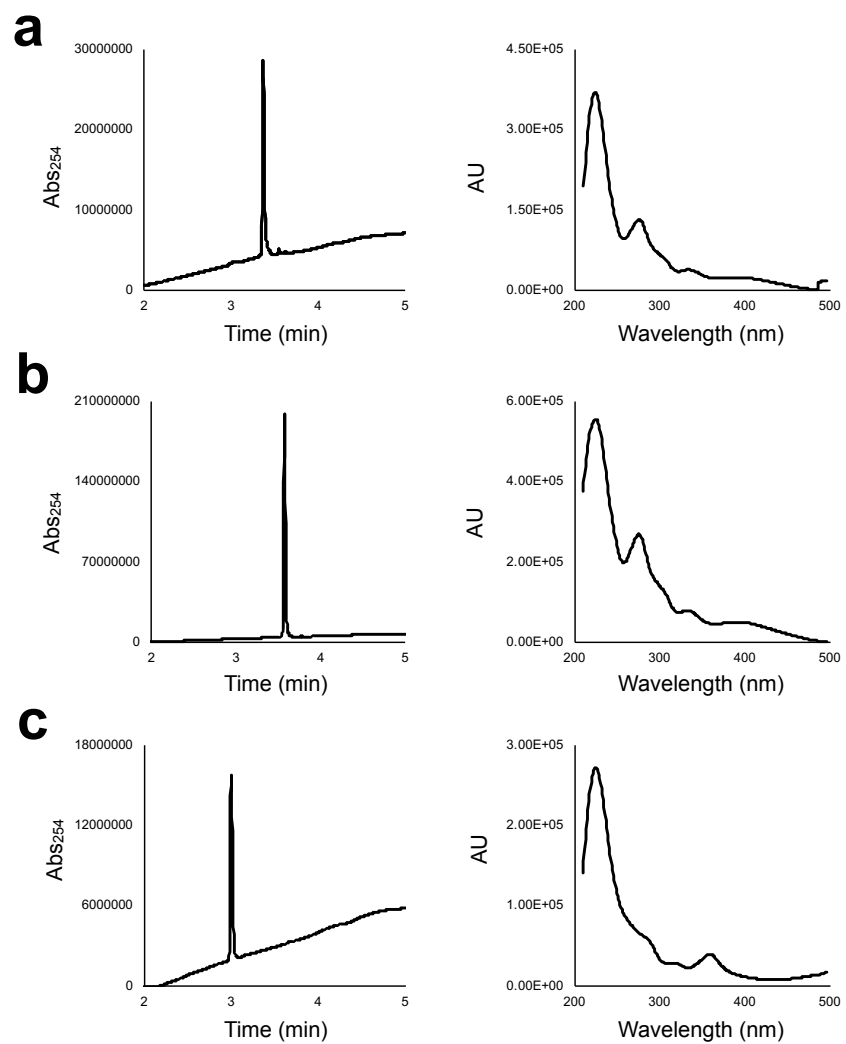

**Figure S10.** UPLC traces and UV spectra of purified a) Kang A, b) J4, and c) KZ. Compounds were analyzed using a Waters Acquity H-Class UPLC.



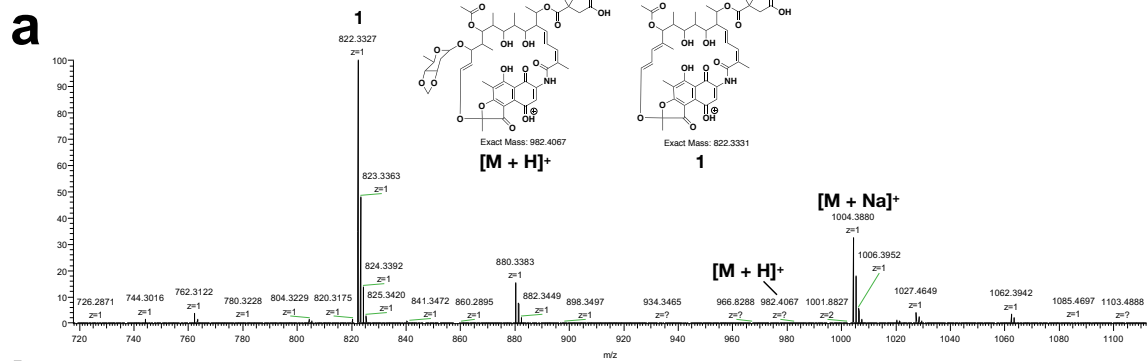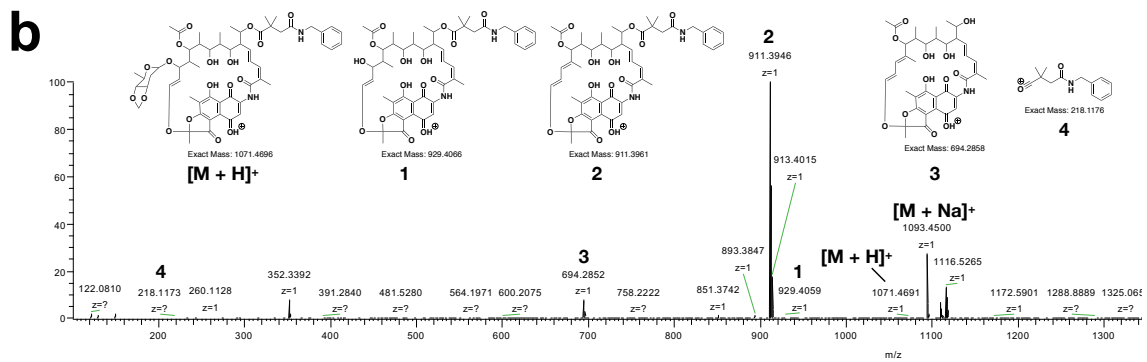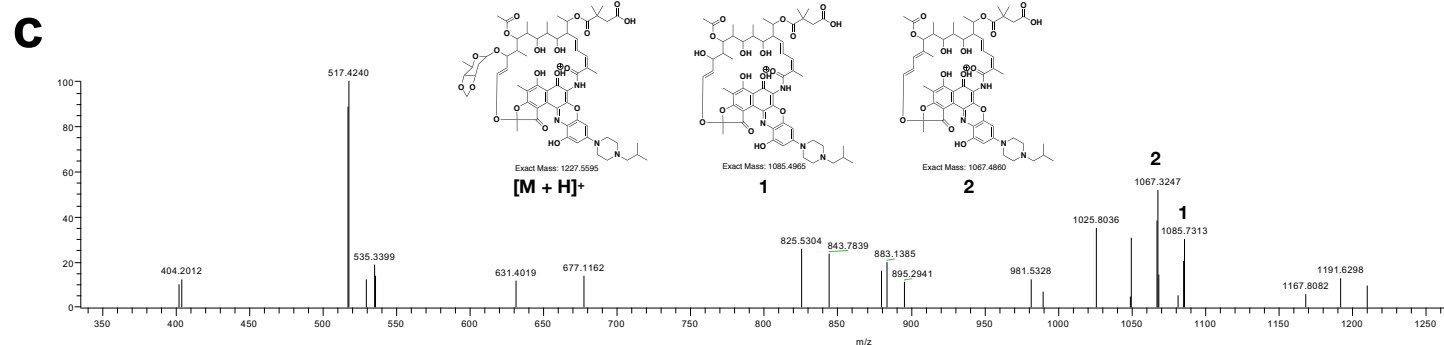

**Figure S11.** Mass fragmentation analysis of a) Kang A, b) J4, and c) KZ. Samples were analyzed by LC-MS/MS.

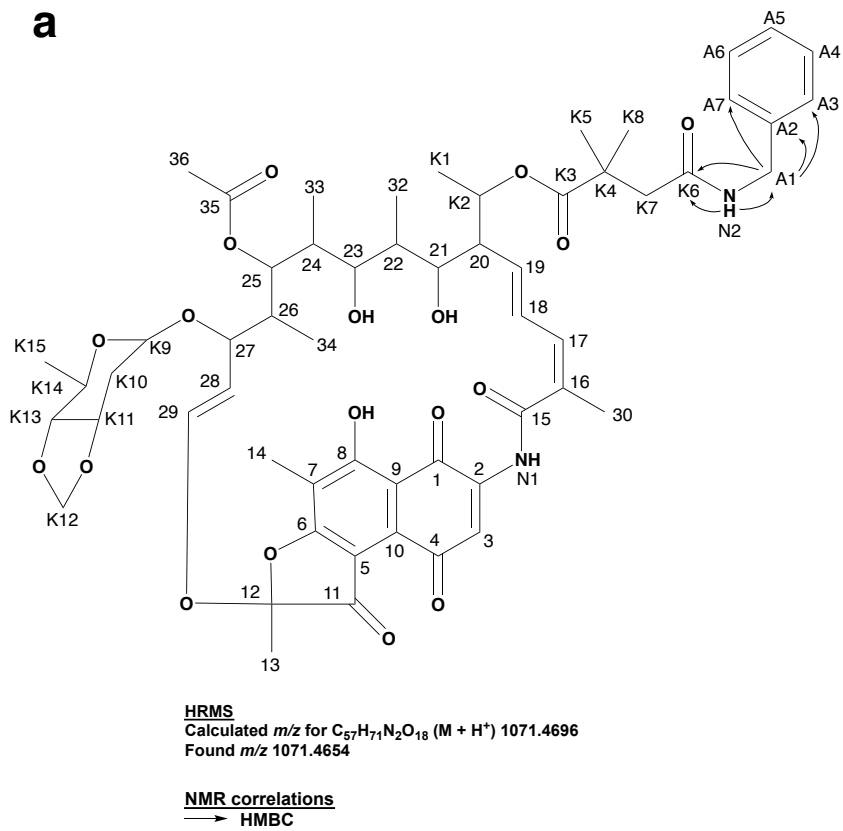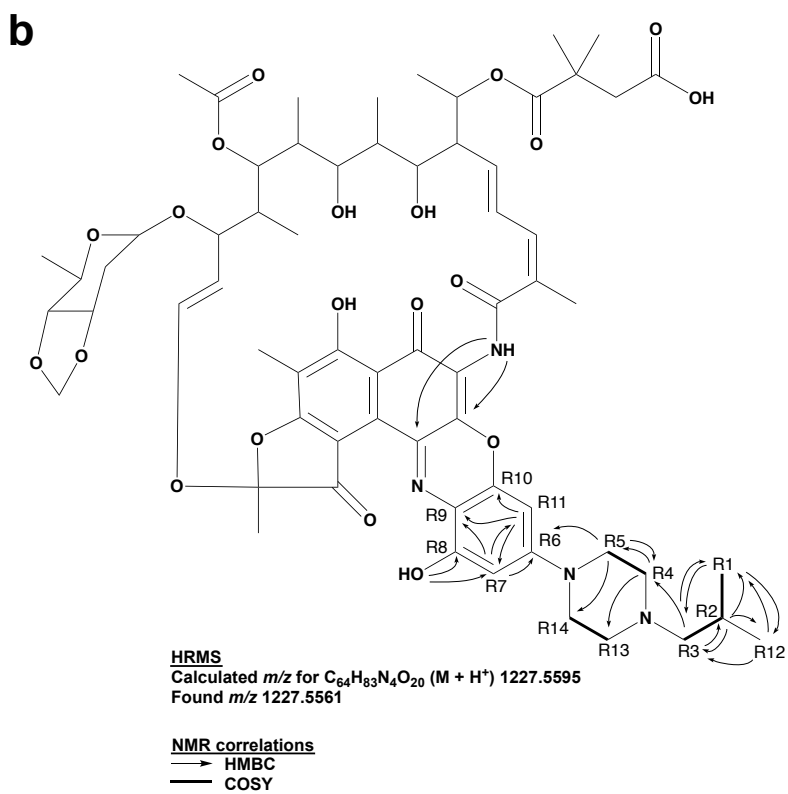

**Figure S12.** HRMS and NMR data used to verify the structures of a) J4 and b) KZ.

**Table S4.**  $^1\text{H}$  and  $^{13}\text{C}$  chemical shifts of Kang A, J4, and KZ.<sup>a</sup>

| Position | Kang A          |                     |                                                     | J4 <sup>b</sup> |                     |                                               | KZ <sup>b,c</sup> |                     |                                                      |
|----------|-----------------|---------------------|-----------------------------------------------------|-----------------|---------------------|-----------------------------------------------|-------------------|---------------------|------------------------------------------------------|
|          | Atom type       | $\delta_{\text{C}}$ | $\delta_{\text{H}}$ (mult., J in Hz)                | Atom type       | $\delta_{\text{C}}$ | $\delta_{\text{H}}$ (mult., J in Hz)          | Atom type         | $\delta_{\text{C}}$ | $\delta_{\text{H}}$ (mult., J in Hz)                 |
| 1        | C               | 185.8               |                                                     | C               | 184.9               |                                               | C                 | 181.9               |                                                      |
| 2        | C               | 140.9               |                                                     | C               | 139.4               |                                               | C                 | 113.5               |                                                      |
| 3        | CH              | 117.0               | 7.80 (s)                                            | CH              | 117.5               | 7.72 (s)                                      | C                 | 128.9               |                                                      |
| 4        | C               | 184.9               |                                                     | C               | 182.2               |                                               | C                 | 143.7               |                                                      |
| 5        | C               | 111.7               |                                                     | C               | 111.1               |                                               | C                 | 104.8               |                                                      |
| 6        | C               | 171.8               |                                                     | C               | 172.6               |                                               | C                 | 173.6               |                                                      |
| 7        | C               | 116.9               |                                                     | C               | 115.8               |                                               | C                 | 107.9               |                                                      |
| 8        | C               | 167.4               |                                                     | C               | 167.0               |                                               | C                 | 169.8 <sup>v</sup>  |                                                      |
| 9        | C               | 111.2               |                                                     | C               | 110.8               |                                               | C                 | 111.8               |                                                      |
| 10       | C               | 132.0               |                                                     | C               | 130.8               |                                               | C                 | 130.7               |                                                      |
| 11       | C               | 194.1               |                                                     | C               | 192.1               |                                               | C                 | 192.0               |                                                      |
| 12       | C               | 109.9               |                                                     | C               | 108.0               |                                               | C                 | 106.1               |                                                      |
| 13       | CH <sub>3</sub> | 23.7                | 1.67 (s)                                            | CH <sub>3</sub> | 22.2                | 1.69 (s)                                      | CH <sub>3</sub>   | 22.2                | 1.69 (s) <sup>m</sup>                                |
| 14       | CH <sub>3</sub> | 7.8                 | 2.34 (s)                                            | CH <sub>3</sub> | 7.7                 | 2.30 (s) <sup>h</sup>                         | CH <sub>3</sub>   | 7.5                 | 2.14 (s) <sup>g</sup>                                |
| 15       | C               | 171.6               |                                                     | C               | 170.9               |                                               | C                 | 171.0               |                                                      |
| 16       | C               | 137.0               |                                                     | C               | 131.5               |                                               | C                 | 131.1               |                                                      |
| 17       | CH              | 129.8               | 6.16 (d, 5.8)                                       | CH              | 132.6               | 6.14 (d, 8.6)                                 | CH                | 128.8               | 5.79 (m) <sup>o</sup>                                |
| 18       | CH              | 128.2               | 5.93 (dd, 15.9, 5.8)                                | CH              | 128.7               | 6.30 (dd, 15.9, 8.6)                          | CH                | 129.7               | 5.77 (m) <sup>o</sup>                                |
| 19       | CH              | 134.1               | 5.81 (dd, 15.9, 9.3)                                | CH              | 134.7               | 5.97 (dd, 15.9, 8.4)                          | CH                | 134.2               | 5.21 (t, 11.3)                                       |
| 20       | CH              | 53.0                | 2.15 (m) <sup>g</sup>                               | CH              | 53.6                | 2.30 (m) <sup>g</sup>                         | CH                | 51.7                | 1.72 (m) <sup>m</sup>                                |
| 21       | CH              | 68.9                | 3.68 (m) <sup>g</sup>                               | CH              | 69.8                | 3.74 (d, 10.0)                                | CH                | 68.0                | 3.30 (m)                                             |
| 22       | CH              | 33.8                | 1.84 (m) <sup>f</sup>                               | CH              | 33.2                | 1.78 (m) <sup>f</sup>                         | CH                | 31.5                | 1.62 (m)                                             |
| 23       | CH              | 79.0                | 2.85 (dd, 10.0, 1.8)                                | CH              | 78.2                | 2.90 (10.1, 3.1)                              | CH                | 77.3                | 2.79 (t, 2.7)                                        |
| 24       | CH              | 36.9                | 1.60 (m)                                            | CH              | 37.4                | 1.47 (m)                                      | CH                | 42.0                | 1.95 (m) <sup>p</sup>                                |
| 25       | CH              | 74.1                | 4.36 (dd, 9.5, 1.0)                                 | CH              | 73.9                | 4.54 (d, 10.3)                                | CH                | 72.2                | 5.14 (br s)                                          |
| 26       | CH              | 37.0                | 2.13 (m) <sup>g</sup>                               | CH              | 37.6                | 1.26 (m) <sup>g</sup>                         | CH                | 35.3                | 1.44 (m)                                             |
| 27       | CH              | 81.5                | 3.85 (dd, 9.3, 2.7)                                 | CH              | 78.8                | 3.82 (d, 5.9)                                 | CH                | 78.2                | 3.54 (m)                                             |
| 28       | CH              | 112.9               | 5.13 (dd, 12.8, 9.3) <sup>p</sup>                   | CH              | 115.9               | 5.06 (dd, 12.3, 6.5)                          | CH                | 111.4               | 4.91 (t, 10.3)                                       |
| 29       | CH              | 146.4               | 6.37 (d, 12.8)                                      | CH              | 144.4               | 6.27 (d, 12.3)                                | CH                | 142.5               | 5.85 (d, 11.8)                                       |
| 30       | CH <sub>3</sub> | 21.1                | 2.06 (s)                                            | CH <sub>3</sub> | 20.2                | 1.94 (s)                                      | CH <sub>3</sub>   | 20.8 <sup>w</sup>   | 2.01 (s)                                             |
| 32       | CH <sub>3</sub> | 12.9                | 0.94 (d, 7.0)                                       | CH <sub>3</sub> | 12.5                | 0.98 (d, 7.0)                                 | CH <sub>3</sub>   | 11.1                | 0.83 (m) <sup>g</sup>                                |
| 33       | CH <sub>3</sub> | 9.4                 | 0.69 (d, 6.7)                                       | CH <sub>3</sub> | 9.5                 | 0.60 (d, 6.7)                                 | CH <sub>3</sub>   | 11.9                | 0.83 (m) <sup>g</sup>                                |
| 34       | CH <sub>3</sub> | 13.4                | 0.38 (d, 7.2)                                       | CH <sub>3</sub> | 11.2                | 0.18 (d, 7.1)                                 | CH <sub>3</sub>   | 12.4                | 0.56 (d, 5.1)                                        |
| 35       | C               | 174.1               |                                                     | C               | 173.6               |                                               | C                 | 169.8 <sup>v</sup>  |                                                      |
| 36       | CH <sub>3</sub> | 21.8                | 2.02 (s)                                            | CH <sub>3</sub> | 21.3                | 2.04 (s)                                      | CH <sub>3</sub>   | 20.9                | 1.94 (s) <sup>p</sup>                                |
| K1       | CH <sub>3</sub> | 19.8                | 1.07 (d, 6.3)                                       | CH <sub>3</sub> | 18.7                | 1.10 (d, 6.3)                                 | CH <sub>3</sub>   | 18.4                | 0.90 (m) <sup>g</sup>                                |
| K2       | CH              | 68.0                | 5.06 (dd, 12.7, 6.3)                                | CH              | 69.0                | 4.93 (dd, 12.2, 6.3)                          | CH                | 68.7                | 4.72 (m)                                             |
| K3       | C               | 176.4               |                                                     | C               | 176.6               |                                               | C                 | 175.1               |                                                      |
| K4       | C               | 40.8                |                                                     | C               | 43.5                |                                               | C                 | 40.0 <sup>z</sup>   |                                                      |
| K5       | CH <sub>3</sub> | 26.2                | 1.17 (s)                                            | CH <sub>3</sub> | 27.0                | 1.23 (s) <sup>y</sup>                         | CH <sub>3</sub>   | 25.3                | 1.05 (s)                                             |
| K6       | C               | 172.3               |                                                     | C               | 170.5               |                                               | C                 | 172.0               |                                                      |
| K7       | CH <sub>2</sub> | 43.5                | 2.66 (d, 16.9)<br>2.53 (d, 16.9)                    | CH <sub>2</sub> | 45.5                | 2.62 (d, 15.3)<br>2.45 (d, 15.3)              | CH <sub>2</sub>   | 43.4                | 2.36 (d, 16.2)<br>2.31 (d, 16.2)                     |
| K8       | CH <sub>3</sub> | 24.9                | 1.23 (s)                                            | CH <sub>3</sub> | 25.1                | 1.36 (s)                                      | CH <sub>3</sub>   | 24.3                | 1.07 (s)                                             |
| K9       | CH              | 97.2                | 4.65 (dd, 9.0, 1.1)                                 | CH              | 98.0                | 4.50 (m) <sup>k</sup>                         | CH                | 96.7                | 4.47 (d, 3.5)                                        |
| K10      | CH <sub>2</sub> | 33.5                | 2.23 (ddd, 15.5, 2.9, 1.1)<br>1.83 (m) <sup>j</sup> | CH <sub>2</sub> | 32.8                | 2.11 (dt, 14.6, 3.0)<br>1.80 (m) <sup>j</sup> | CH <sub>2</sub>   | 32.4                | 1.97 (m)<br>1.80 (m) <sup>s</sup>                    |
| K11      | CH              | 74.9                | 4.10 (m)                                            | CH              | 74.0                | 4.01 (m)                                      | CH                | 73.7                | 4.40 (m)                                             |
| K12      | CH <sub>2</sub> | 95.4                | 5.13 (s) <sup>g</sup><br>4.87 (s)                   | CH <sub>2</sub> | 95.0                | 5.09 (s)<br>4.82 (s)                          | CH <sub>2</sub>   | 94.6                | 5.04 (m)<br>4.75 (m)                                 |
| K13      | CH              | 75.9                | 3.64 (m) <sup>q</sup>                               | CH              | 75.7                | 3.55 (dd, 9.0, 5.3)                           | CH                | 74.8                | 3.59 (dd, 8.8, 3.5)                                  |
| K14      | CH              | 70.5                | 3.36 (m)                                            | CH              | 70.2                | 3.31 (m)                                      | CH                | 69.3                | 3.23 (m)                                             |
| K15      | CH <sub>3</sub> | 18.8                | 1.27 (d, 6.2)                                       | CH <sub>3</sub> | 18.7                | 1.24 (d, 6.2) <sup>y</sup>                    | CH <sub>3</sub>   | 18.3                | 1.13 (d, 6.0)                                        |
| N1       | NH              |                     | 8.34 (s)                                            | NH              |                     | 8.34 (s)                                      | NH                |                     | 9.30 (s)                                             |
| N2       | NH              |                     |                                                     | NH              |                     | 6.60 (t, 5.1)                                 |                   |                     |                                                      |
| OH-8     | OH              |                     | 12.60 (s)                                           |                 |                     |                                               | OH                |                     | 9.86 (s)                                             |
| OH-R8    |                 |                     |                                                     |                 |                     |                                               |                   |                     |                                                      |
| J4-A1    |                 |                     |                                                     | CH <sub>2</sub> | 43.5                | 4.46 (m) <sup>k</sup><br>4.26 (dd, 14.6, 5.1) |                   |                     |                                                      |
| J4-A2    |                 |                     |                                                     | C               | 138.7               |                                               |                   |                     |                                                      |
| J4-A3    |                 |                     |                                                     | CH              | 128.0               | 7.23 (m) <sup>lx</sup>                        |                   |                     |                                                      |
| J4-A4    |                 |                     |                                                     | CH              | 128.7               | 7.30 (m) <sup>lx</sup>                        |                   |                     |                                                      |
| J4-A5    |                 |                     |                                                     | CH              | 127.4               | 7.27 (m) <sup>lx</sup>                        |                   |                     |                                                      |
| J4-A6    |                 |                     |                                                     | CH              | 128.7               | 7.30 (m) <sup>lx</sup>                        |                   |                     |                                                      |
| J4-A7    |                 |                     |                                                     | CH              | 128.0               | 7.23 (m) <sup>lx</sup>                        |                   |                     |                                                      |
| KZ-R1    |                 |                     |                                                     |                 |                     |                                               | CH <sub>3</sub>   | 20.8 <sup>w</sup>   | 0.90 (m) <sup>g</sup>                                |
| KZ-R2    |                 |                     |                                                     |                 |                     |                                               | CH                | 24.8                | 1.83 (m) <sup>s</sup>                                |
| KZ-R3    |                 |                     |                                                     |                 |                     |                                               | CH <sub>2</sub>   | 65.8                | 2.12 (m) <sup>p</sup><br>2.12 (m) <sup>p</sup>       |
| KZ-R4    |                 |                     |                                                     |                 |                     |                                               | CH <sub>2</sub>   | 52.8                | 2.48 (m) <sup>ly</sup><br>2.48 (m) <sup>ly</sup>     |
| KZ-R5    |                 |                     |                                                     |                 |                     |                                               | CH <sub>2</sub>   | 46.9                | 3.65 (br s) <sup>u</sup><br>3.65 (br s) <sup>u</sup> |
| KZ-R6    |                 |                     |                                                     |                 |                     |                                               | C                 | 156.4               |                                                      |
| KZ-R7    |                 |                     |                                                     |                 |                     |                                               | CH                | 94.0                | 6.51 (s)                                             |
| KZ-R8    |                 |                     |                                                     |                 |                     |                                               | C                 | 156.4               |                                                      |
| KZ-R9    |                 |                     |                                                     |                 |                     |                                               | C                 | 117.9               |                                                      |
| KZ-R10   |                 |                     |                                                     |                 |                     |                                               | C                 | 145.5               |                                                      |
| KZ-R11   |                 |                     |                                                     |                 |                     |                                               | CH                | 91.3                | 6.77 (s)                                             |
| KZ-R12   |                 |                     |                                                     |                 |                     |                                               | CH <sub>3</sub>   | 20.8 <sup>v</sup>   | 0.84 (m) <sup>q</sup>                                |
| KZ-R13   |                 |                     |                                                     |                 |                     |                                               | CH <sub>2</sub>   | 52.8                | 2.48 (m) <sup>ly</sup><br>2.48 (m) <sup>ly</sup>     |
| KZ-R14   |                 |                     |                                                     |                 |                     |                                               | CH <sub>2</sub>   | 46.9                | 3.65 (br s) <sup>u</sup><br>3.65 (br s) <sup>u</sup> |

<sup>a</sup> <sup>1</sup>H and <sup>13</sup>C NMR data were obtained at 600 and 150 MHz, respectively, at 25 °C on a Bruker Avance NMR with a TCI triple resonance cryoprobe. Solvents used were: CD<sub>2</sub>Cl<sub>2</sub> (Kang A), CDCl<sub>3</sub> (J4), and DMSO-d<sub>6</sub> (KZ).

<sup>b</sup> Numbering of J4 and KZ carbon atoms is shown in Figure S12. Numbering of KZ carbon atoms has been modified from the numbering system for rifalazil presented in: Mae *et al.*, Isolation and identification of major metabolites of rifalazil in mouse and human, *Xenobiotica*, 1999, 29, 1073-1087.

<sup>c</sup> KZ exhibited broad <sup>1</sup>H peaks in a number of common NMR solvents, possibly due to a conformational exchange process as previously reported for other benzoxazinorifamycins (Gill *et al.*, Structure-based design of novel benzoxazinorifamycins with potent binding affinity to wild-type and rifampin-resistant mutant *Mycobacterium tuberculosis* RNA polymerases, *J Med Chem*, 2012, 55, 3814-3826). Low temperature experiments were attempted in an effort to improve the spectra, but were unsuccessful. The dataset presented here was collected at 25 °C in DMSO-d<sub>6</sub>, which yielded the sharpest peaks of the conditions tested. While the presence of the KZ synthetic modification is apparent in the signals for KZ carbons R1 to R14 and their associated protons, the broadness of the proton peaks resulted in some ambiguity in multiplicity analysis and in peak assignments at other parts of the molecule.

<sup>d-u</sup> overlapping <sup>1</sup>H signals.

<sup>v,w</sup> overlapping <sup>13</sup>C signals.

<sup>x,y</sup> <sup>1</sup>H signal overlapped with solvent peak.

<sup>z</sup> <sup>13</sup>C signal overlapped with solvent peak.

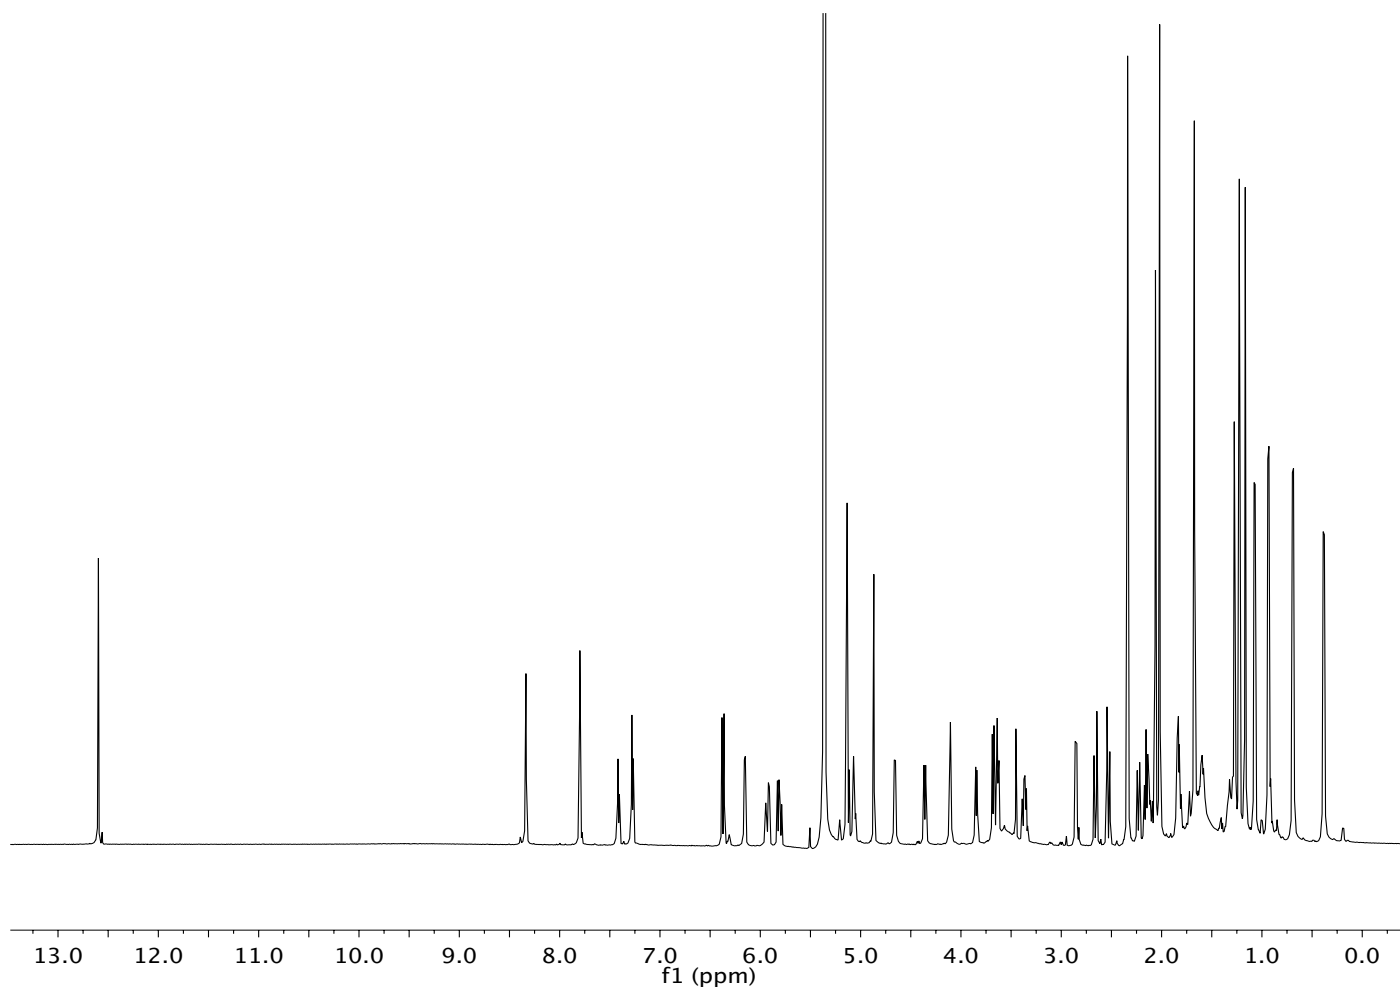

**Figure S13.**  $^1\text{H}$  NMR spectrum of Kang A in  $\text{CD}_2\text{Cl}_2$ .

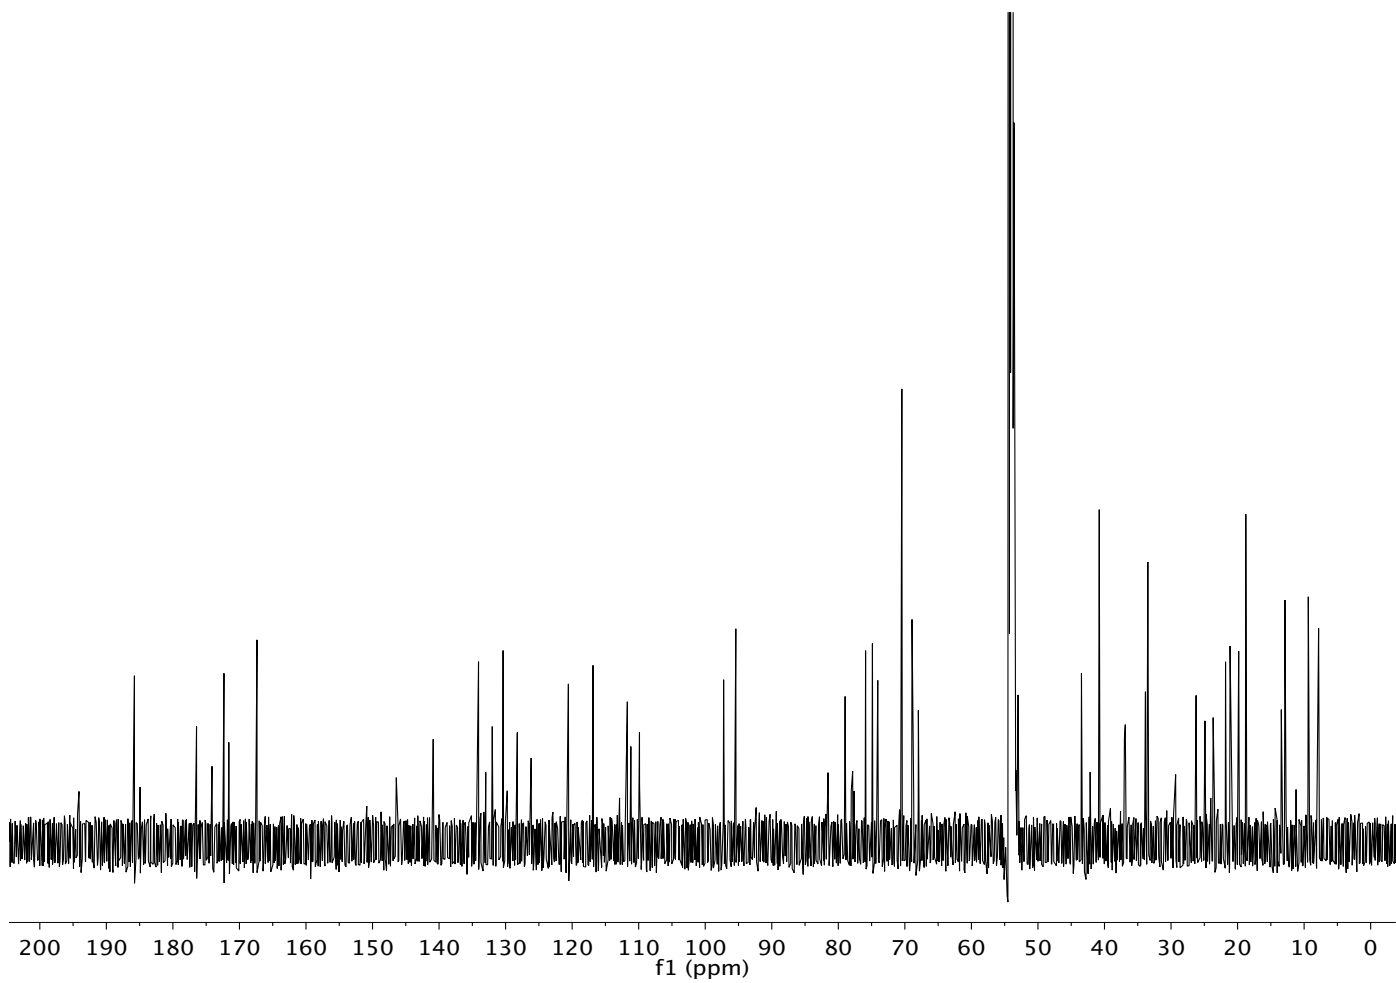

**Figure S14.**  $^{13}\text{C}$  NMR spectrum of Kang A in  $\text{CD}_2\text{Cl}_2$ .

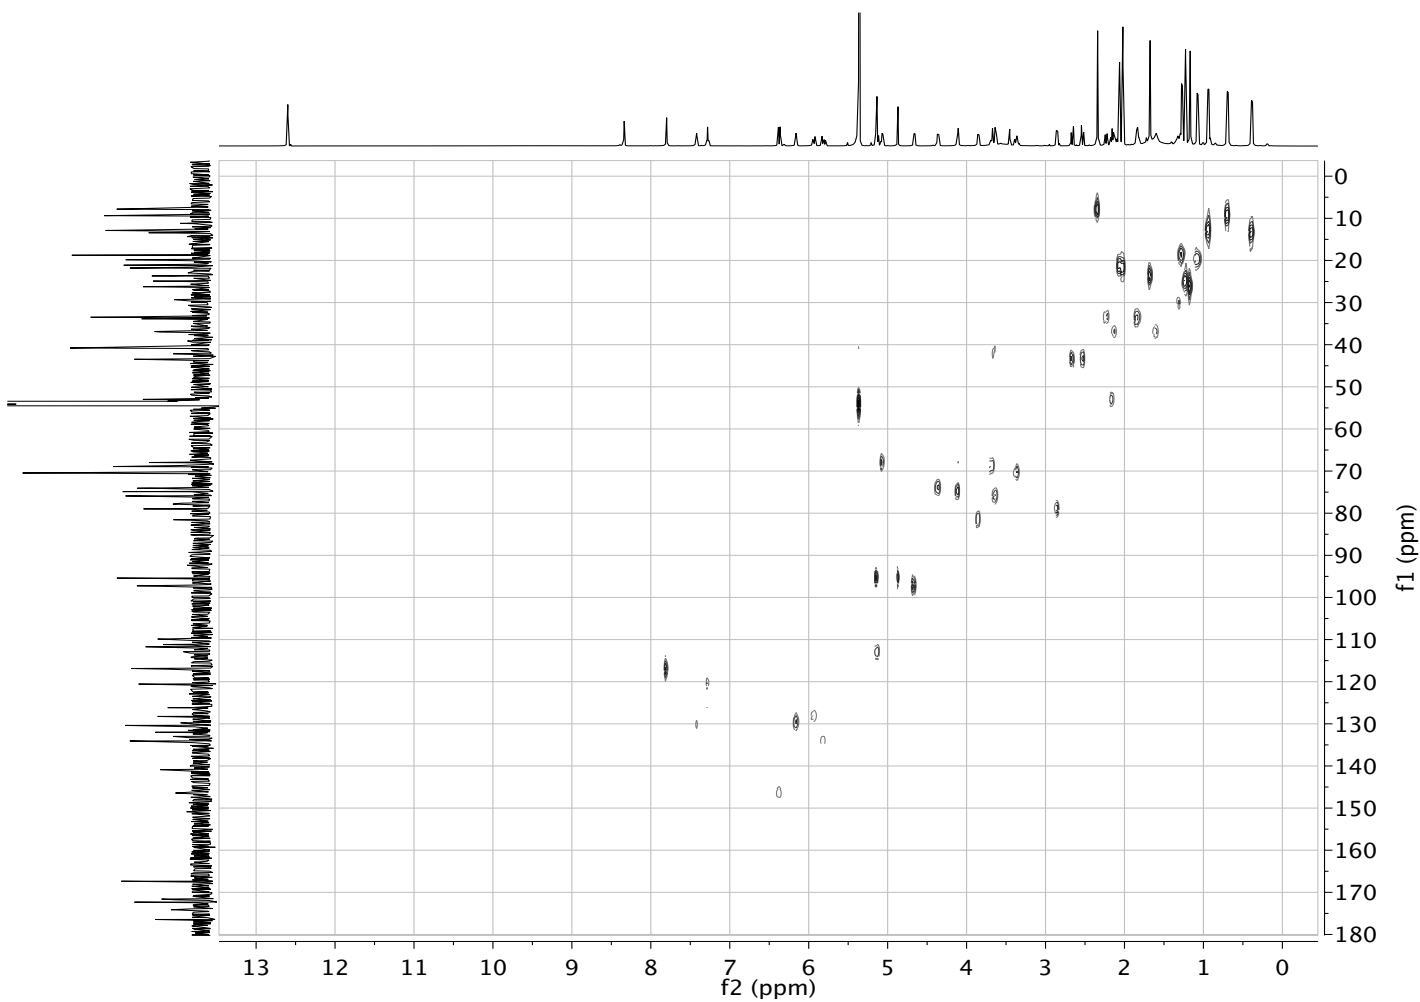

Figure S15. HMQC spectrum of Kang A in CD<sub>2</sub>Cl<sub>2</sub>.

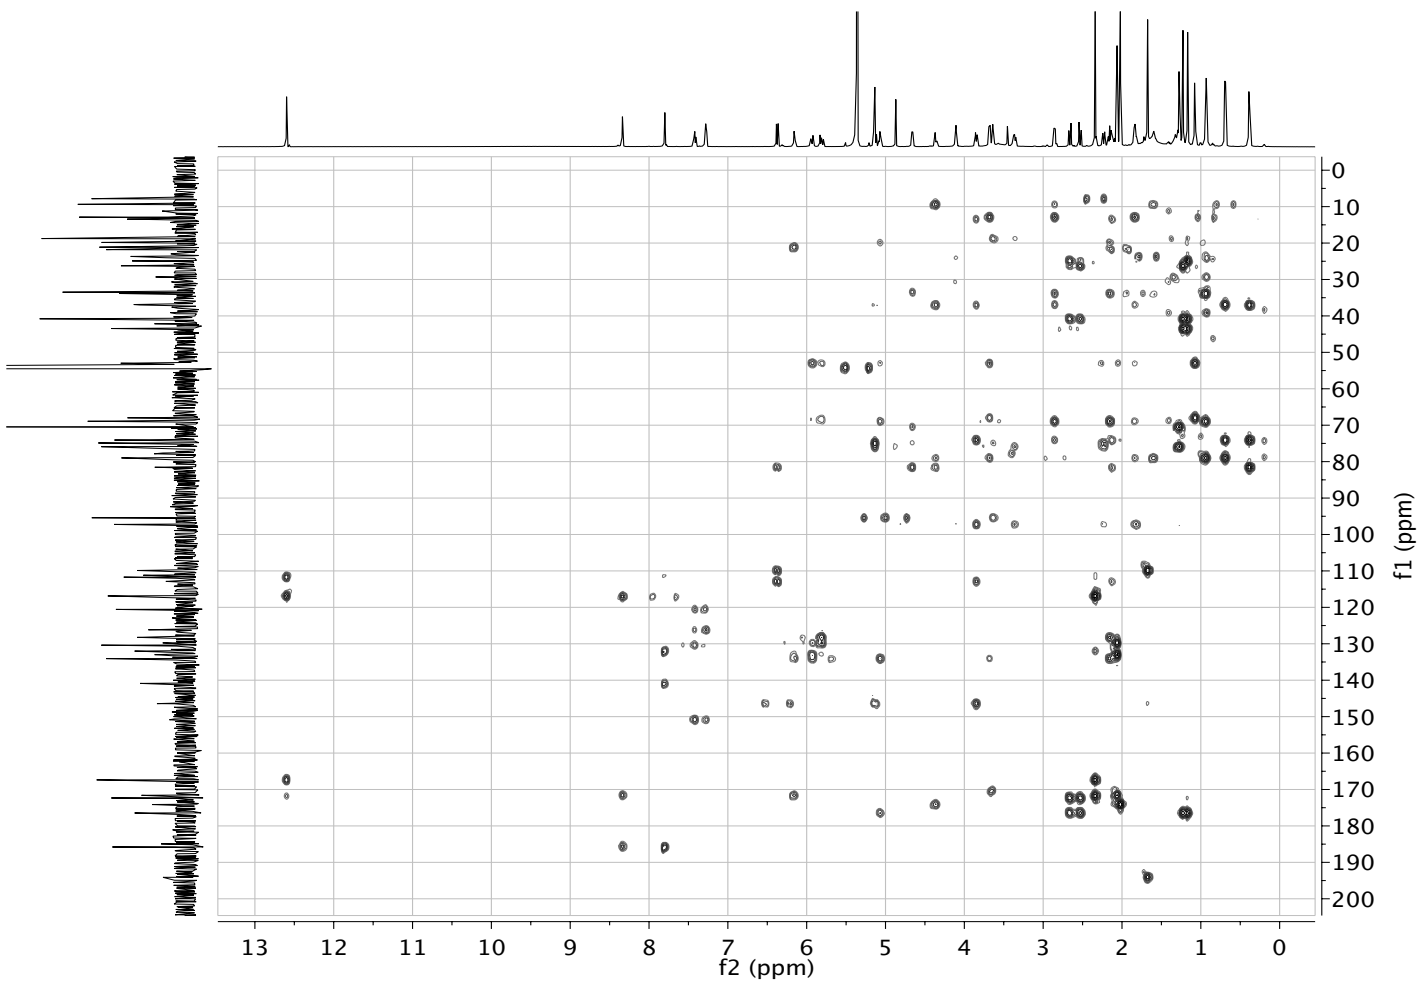

**Figure S16.** HMBC spectrum of Kang A in CD<sub>2</sub>Cl<sub>2</sub>.



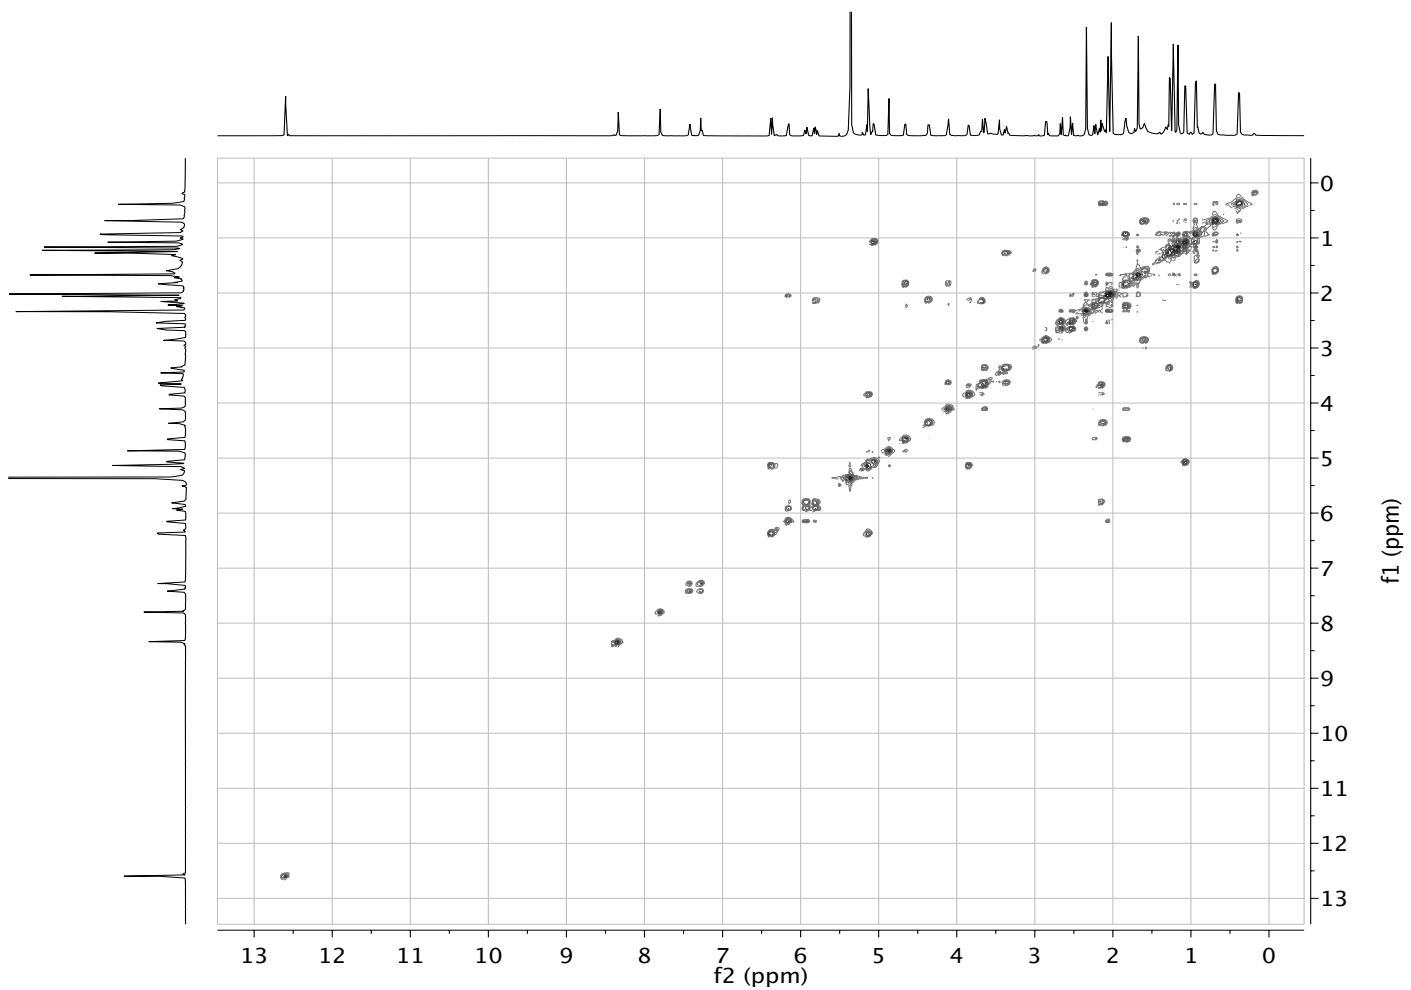

**Figure S17.** COSY spectrum of Kang A in  $\text{CD}_2\text{Cl}_2$ .

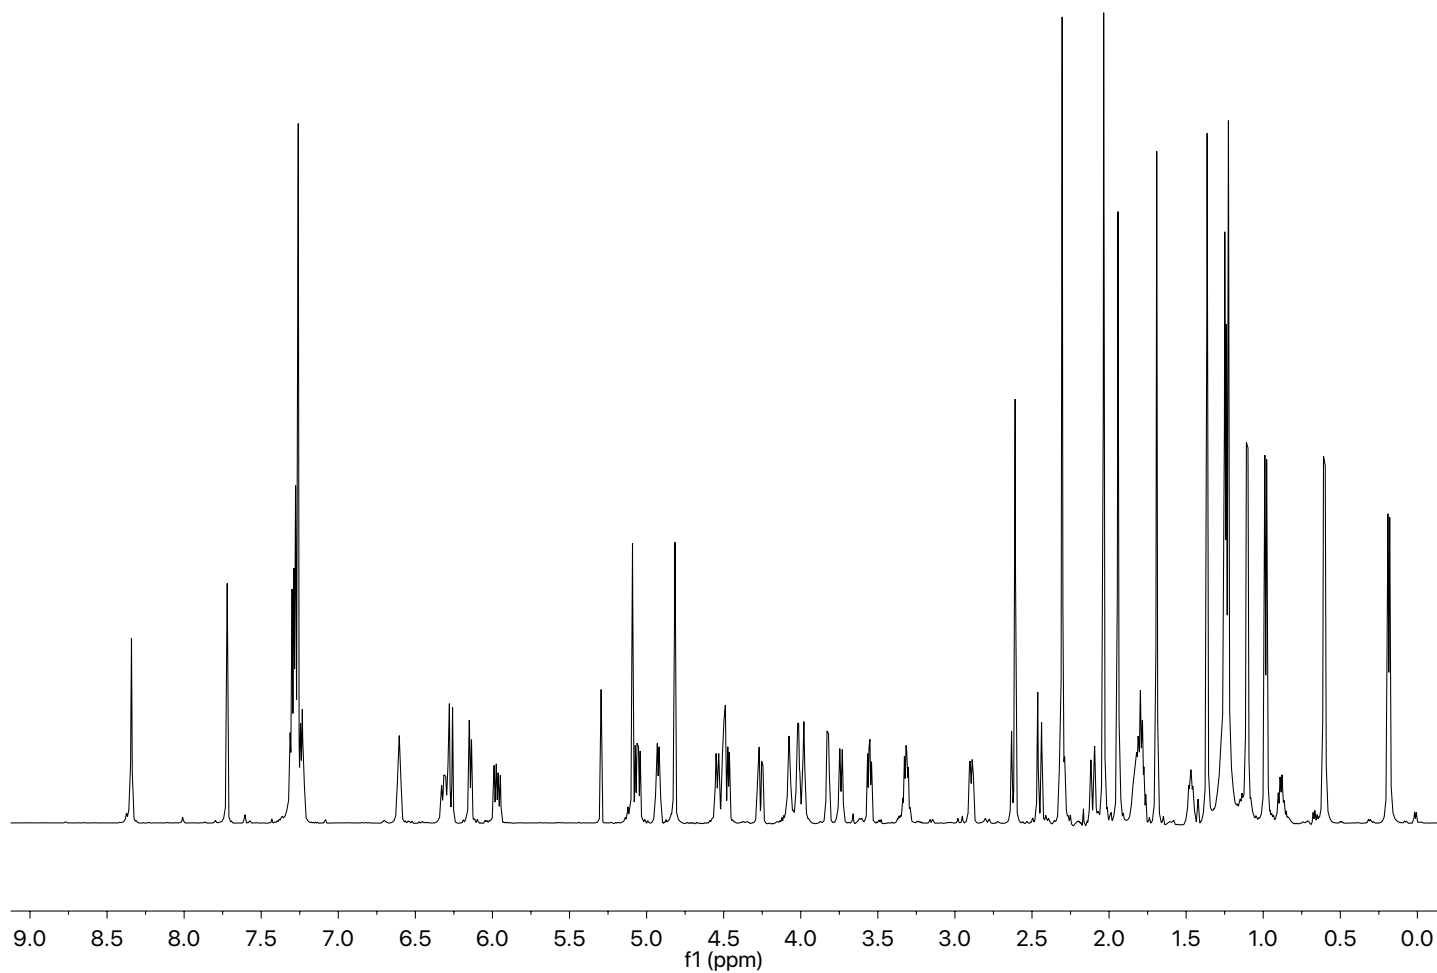

**Figure S18.**  $^1\text{H}$  NMR spectrum of J4 in  $\text{CDCl}_3$ .

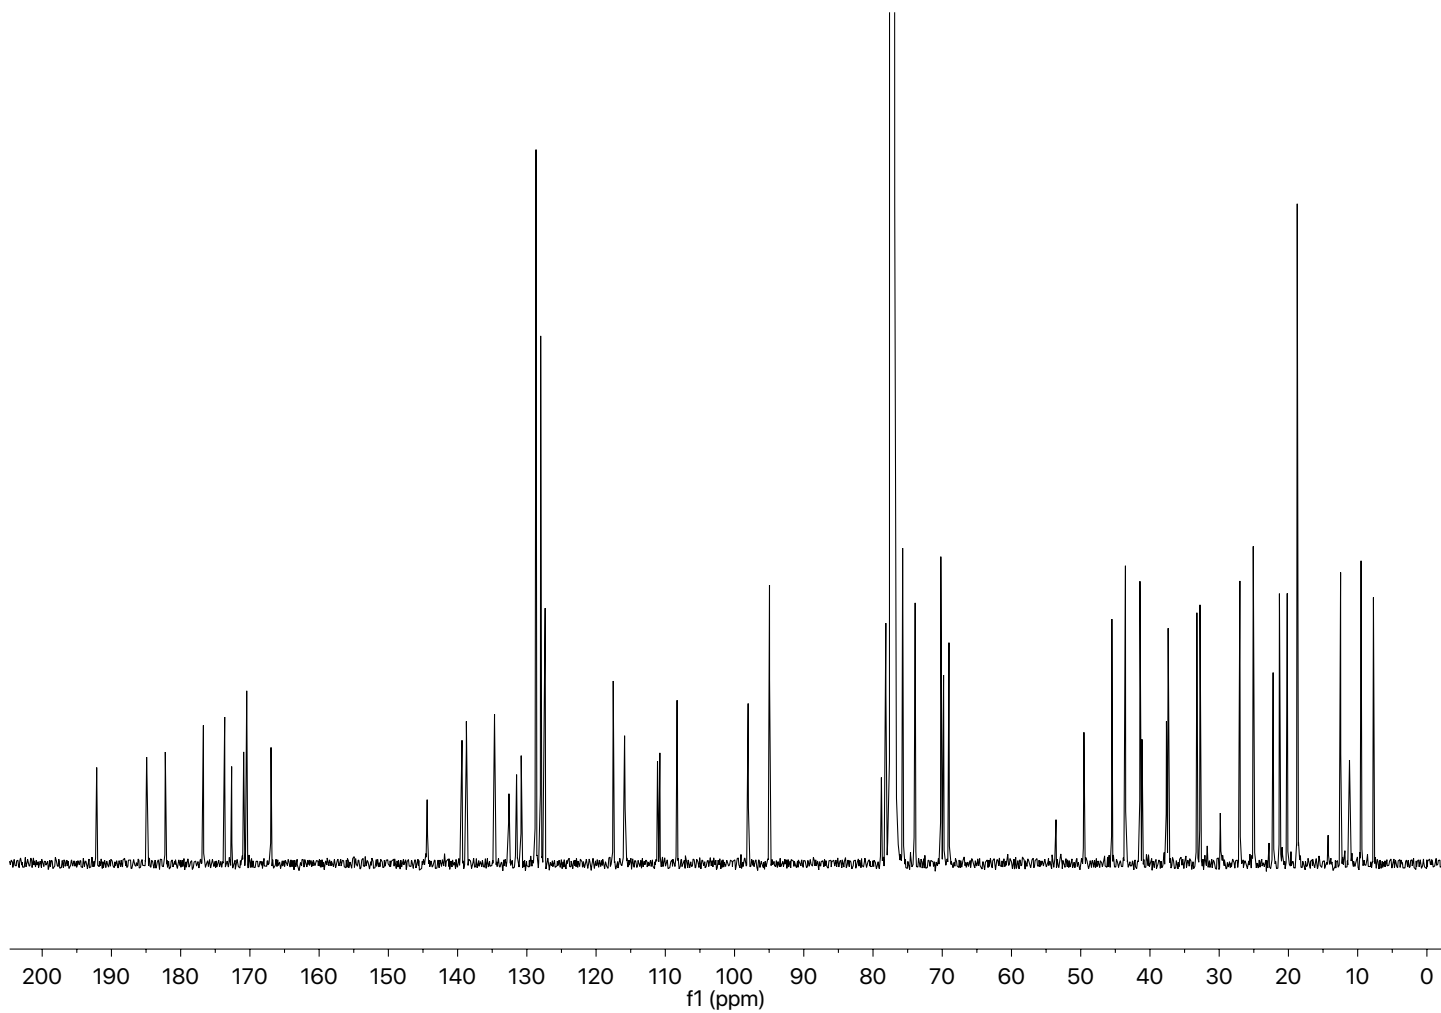

**Figure S19.**  $^{13}\text{C}$  NMR spectrum of J4 in  $\text{CDCl}_3$ .

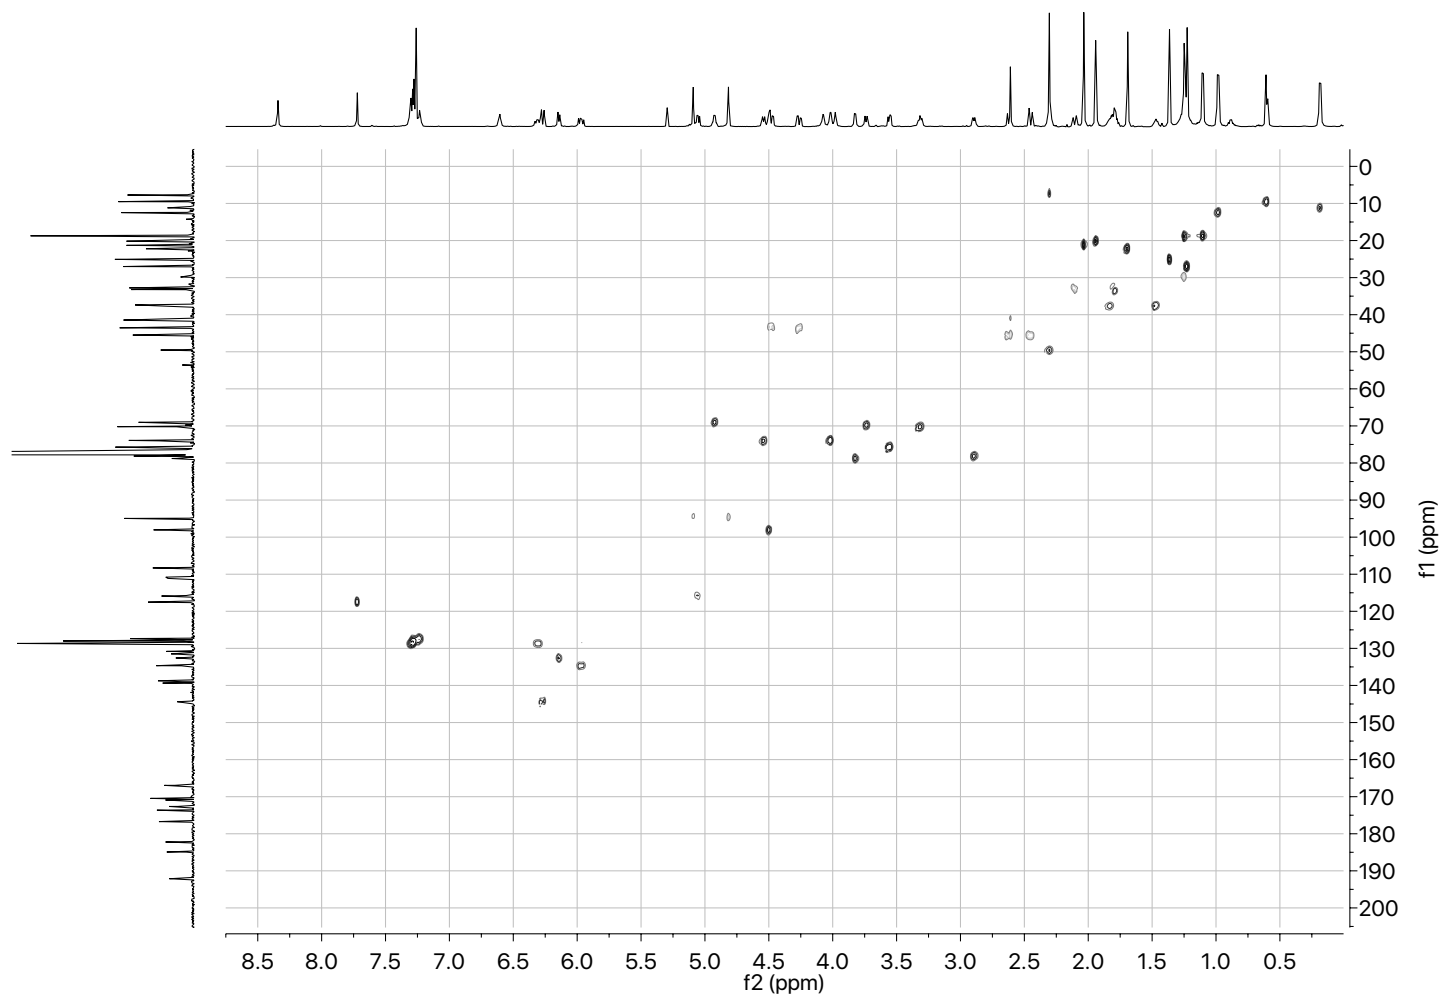

**Figure S20.** HSQC NMR spectrum of J4 in CDCl<sub>3</sub>.

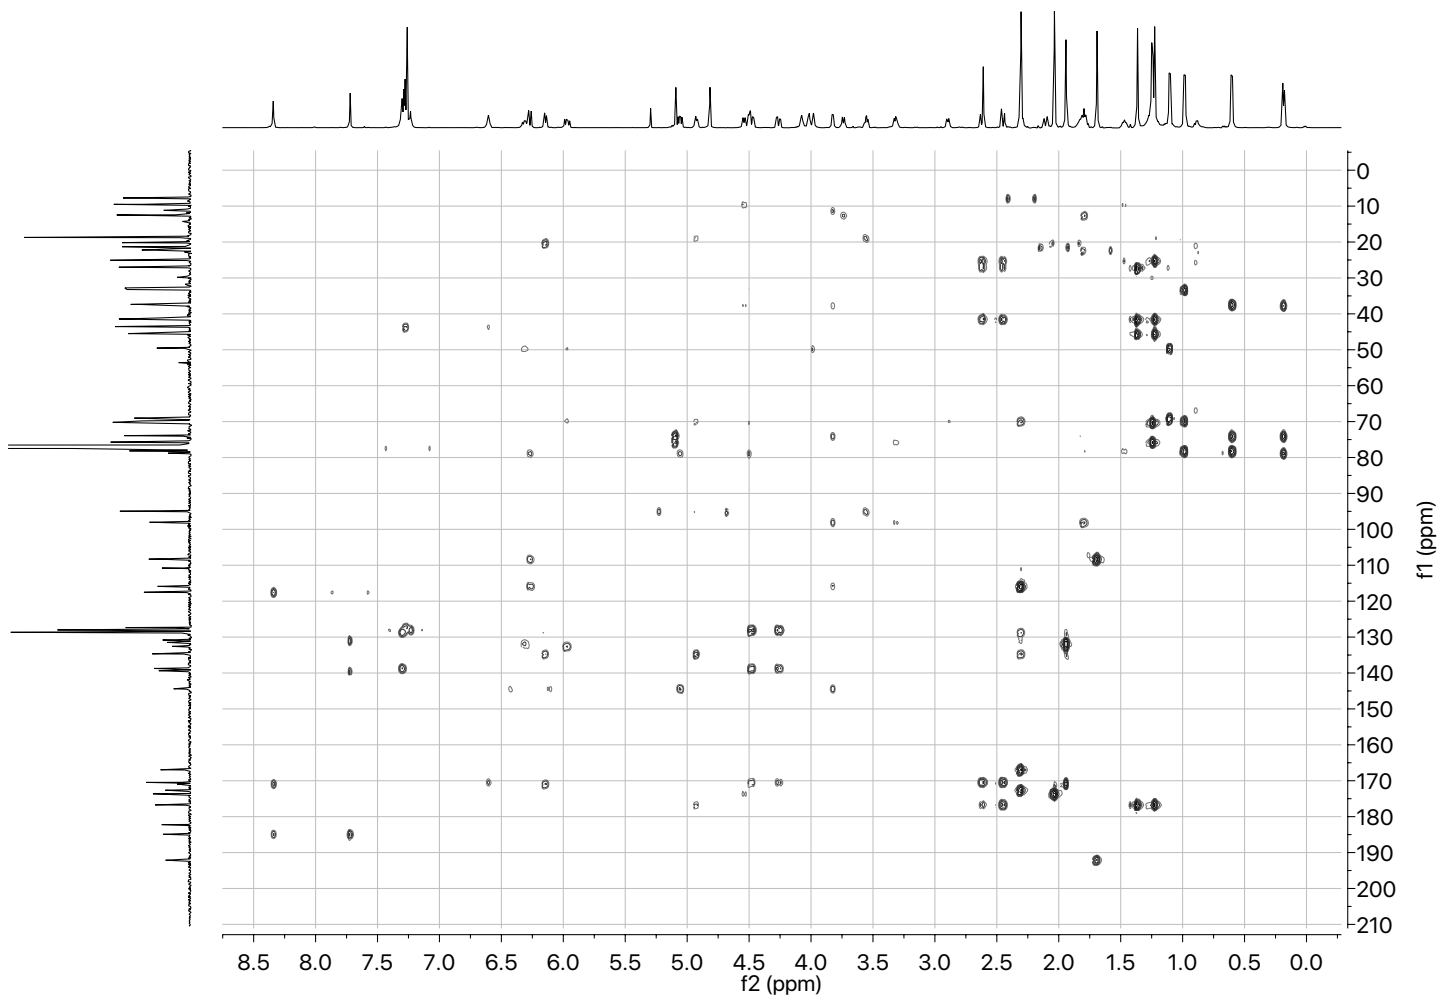

Figure S21. HMBC NMR spectrum of J4 in CDCl<sub>3</sub>.

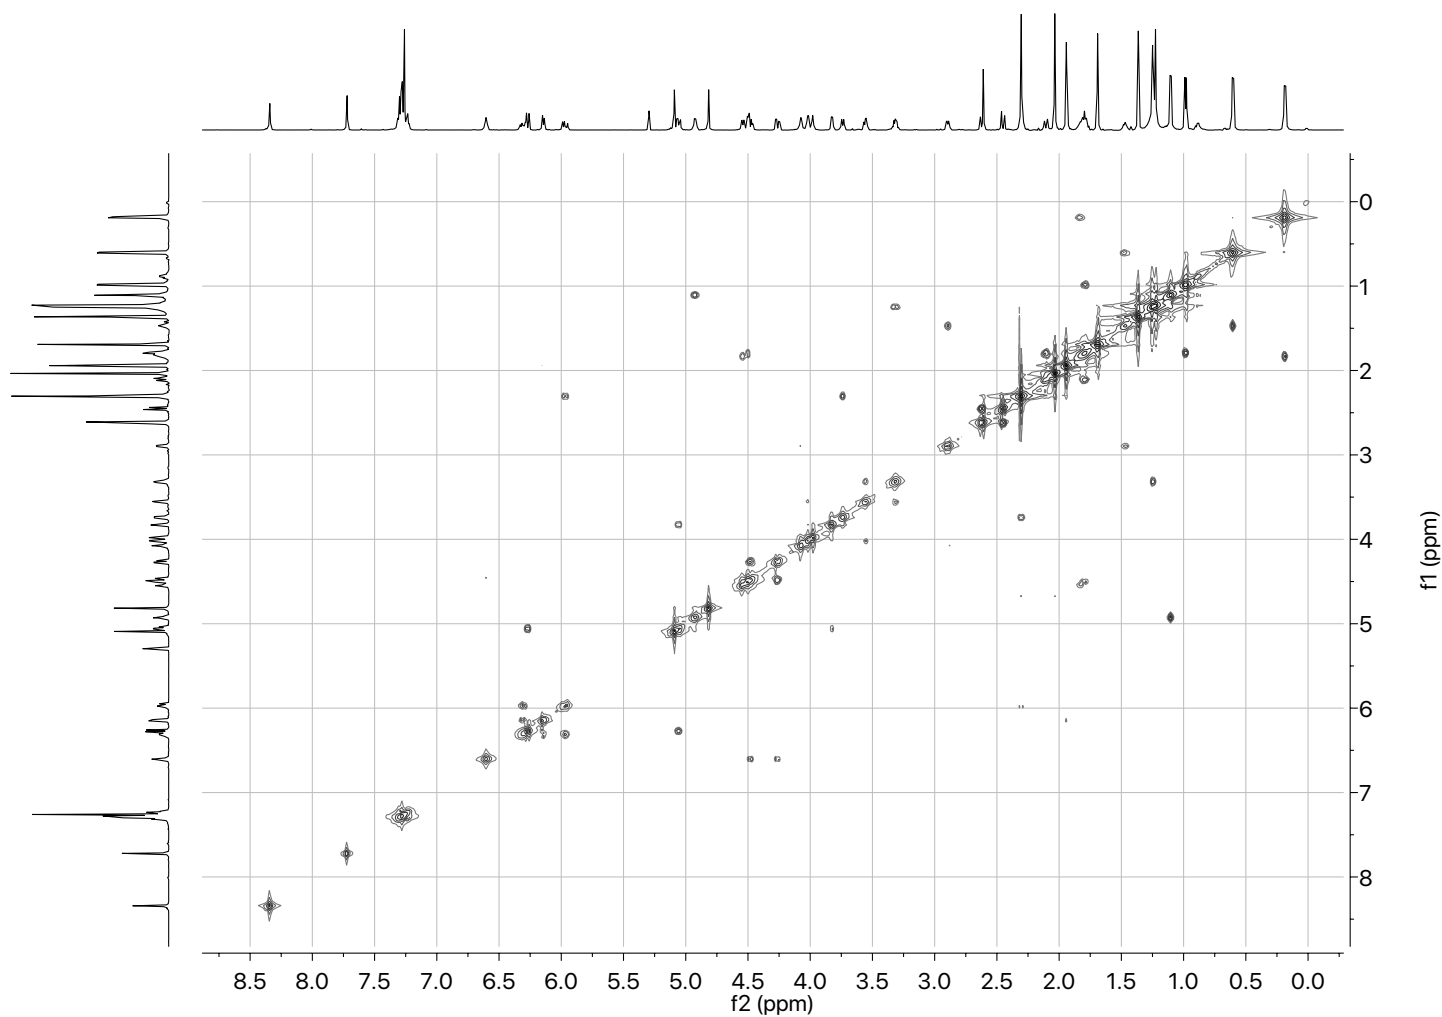

**Figure S22.** COSY NMR spectrum of J4 in  $\text{CDCl}_3$ .

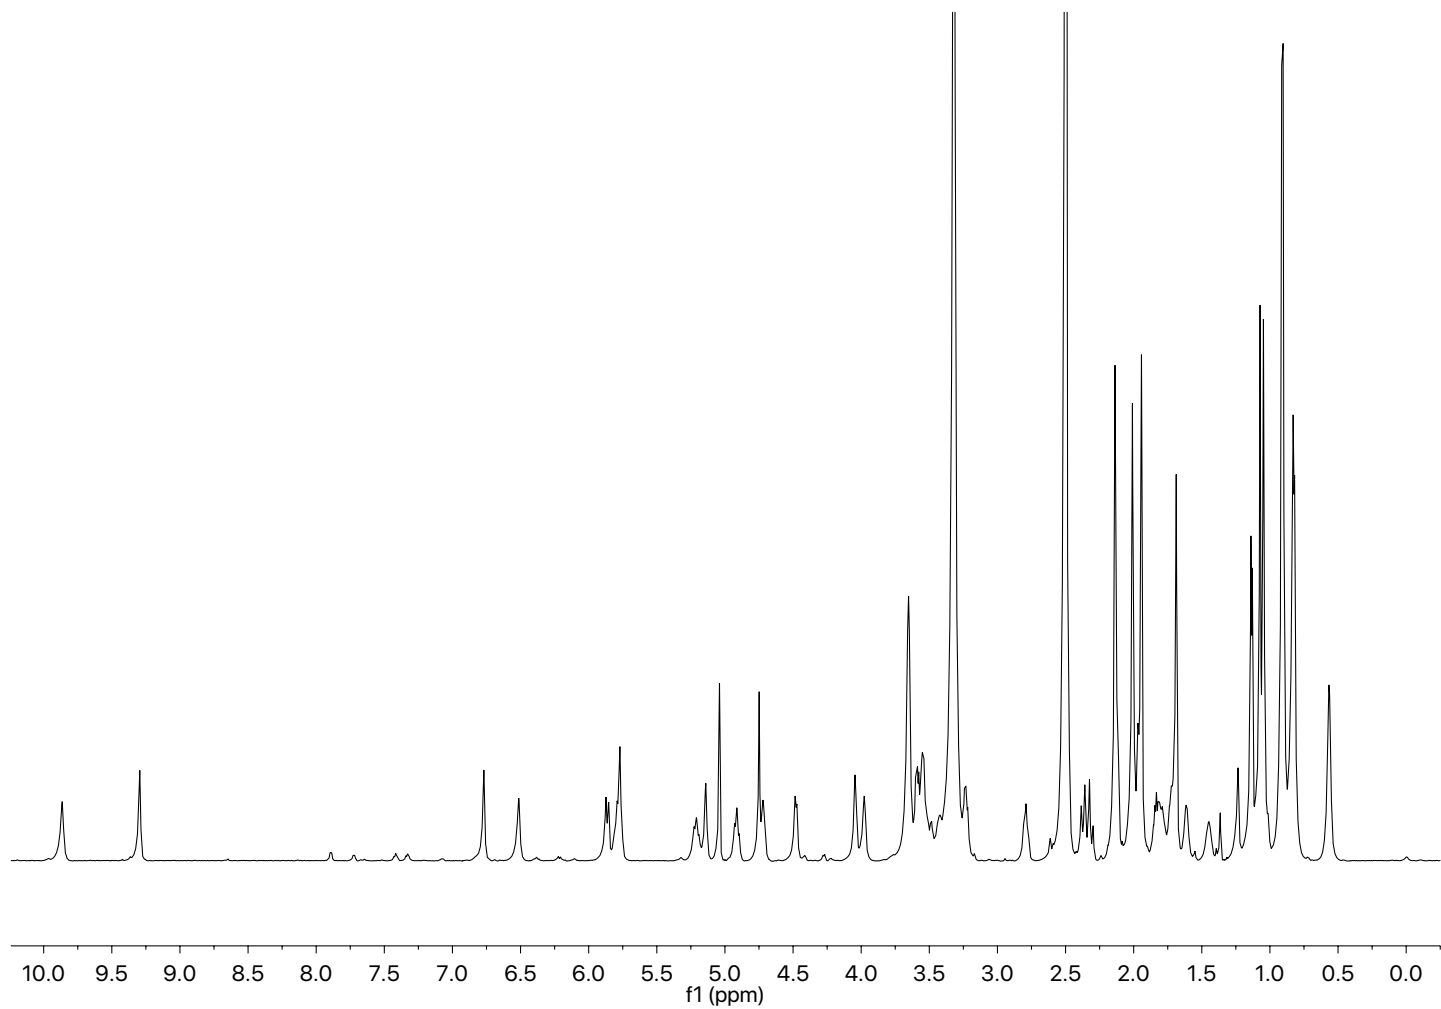

**Figure S23.**  $^1\text{H}$  NMR spectrum of KZ in  $\text{DMSO-d}_6$ .

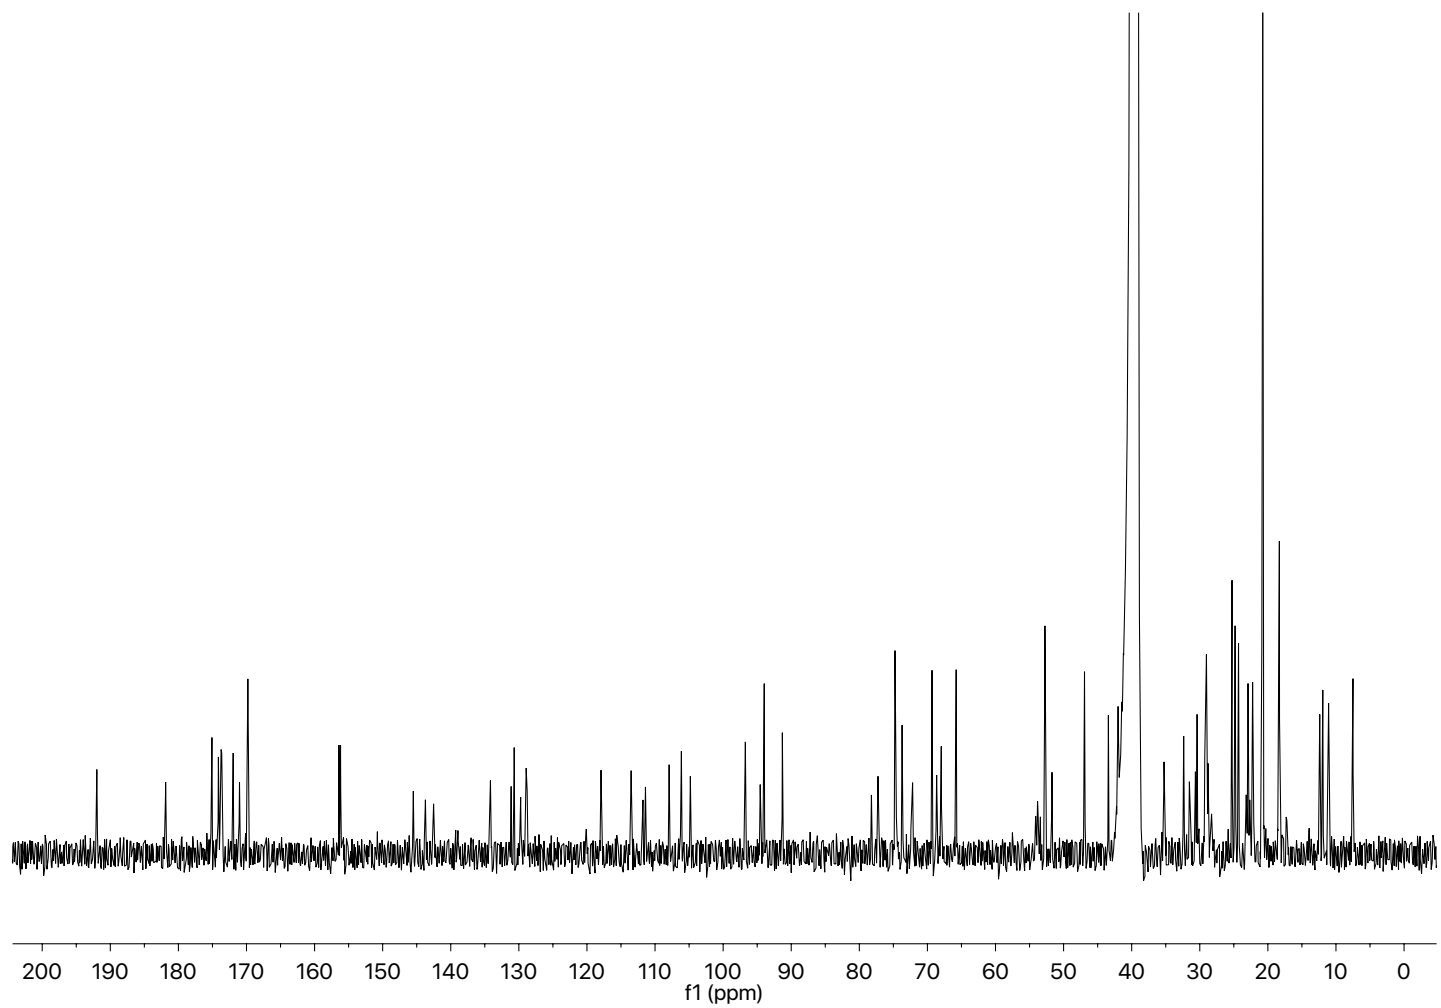

**Figure S24.**  $^{13}\text{C}$  NMR spectrum of KZ in  $\text{DMSO-d}_6$ .



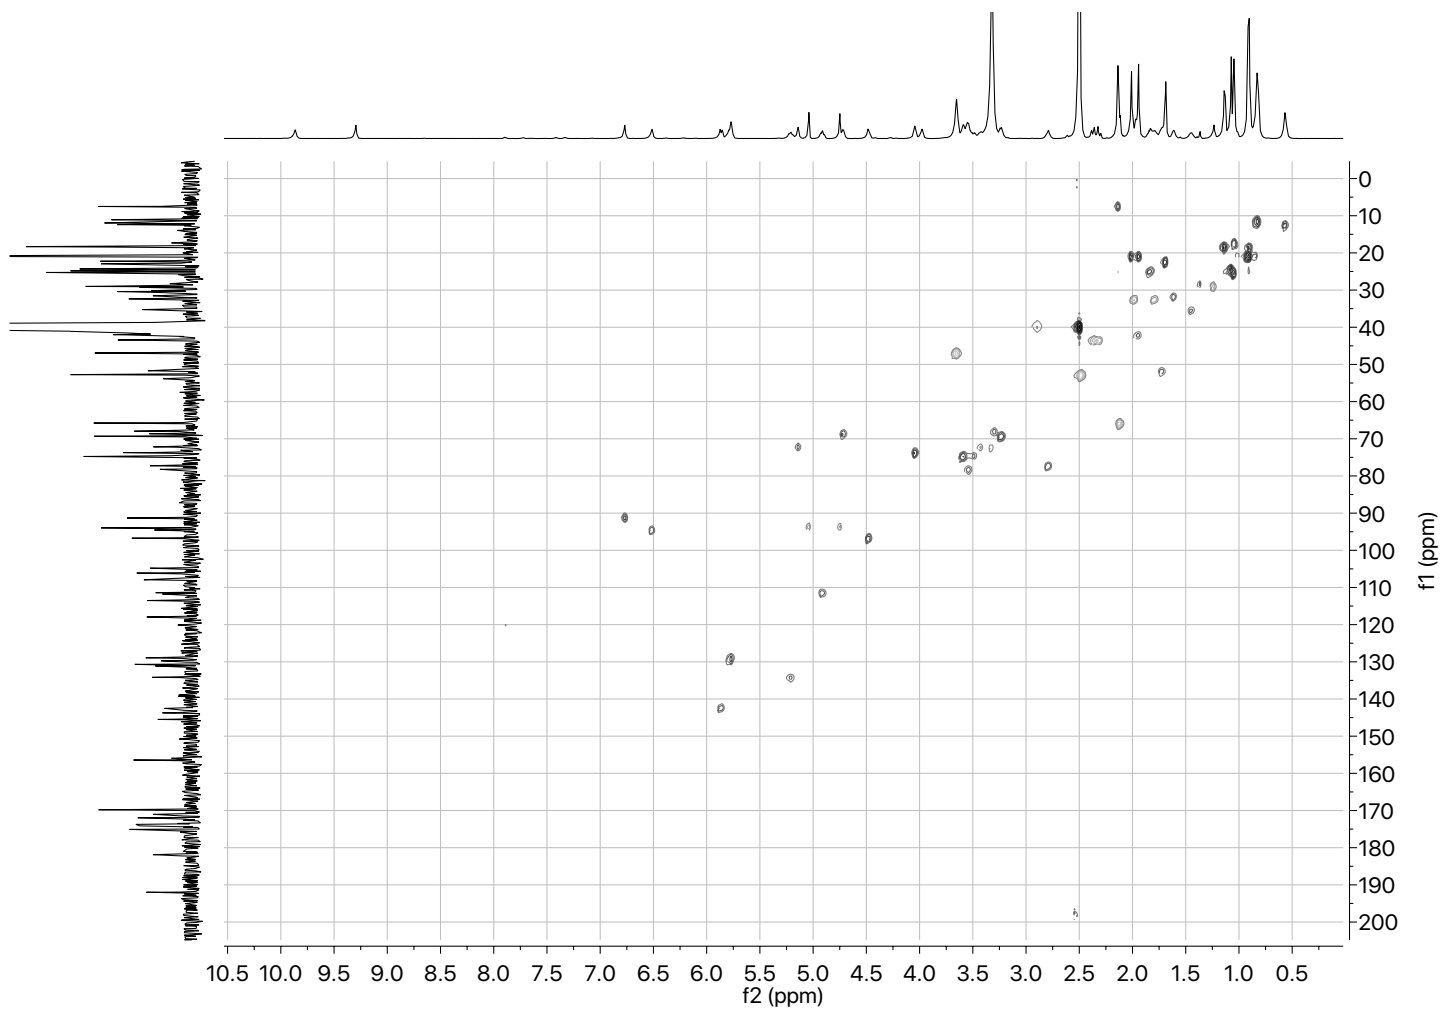

**Figure S25.** HSQC NMR spectrum of KZ in DMSO-d<sub>6</sub>.

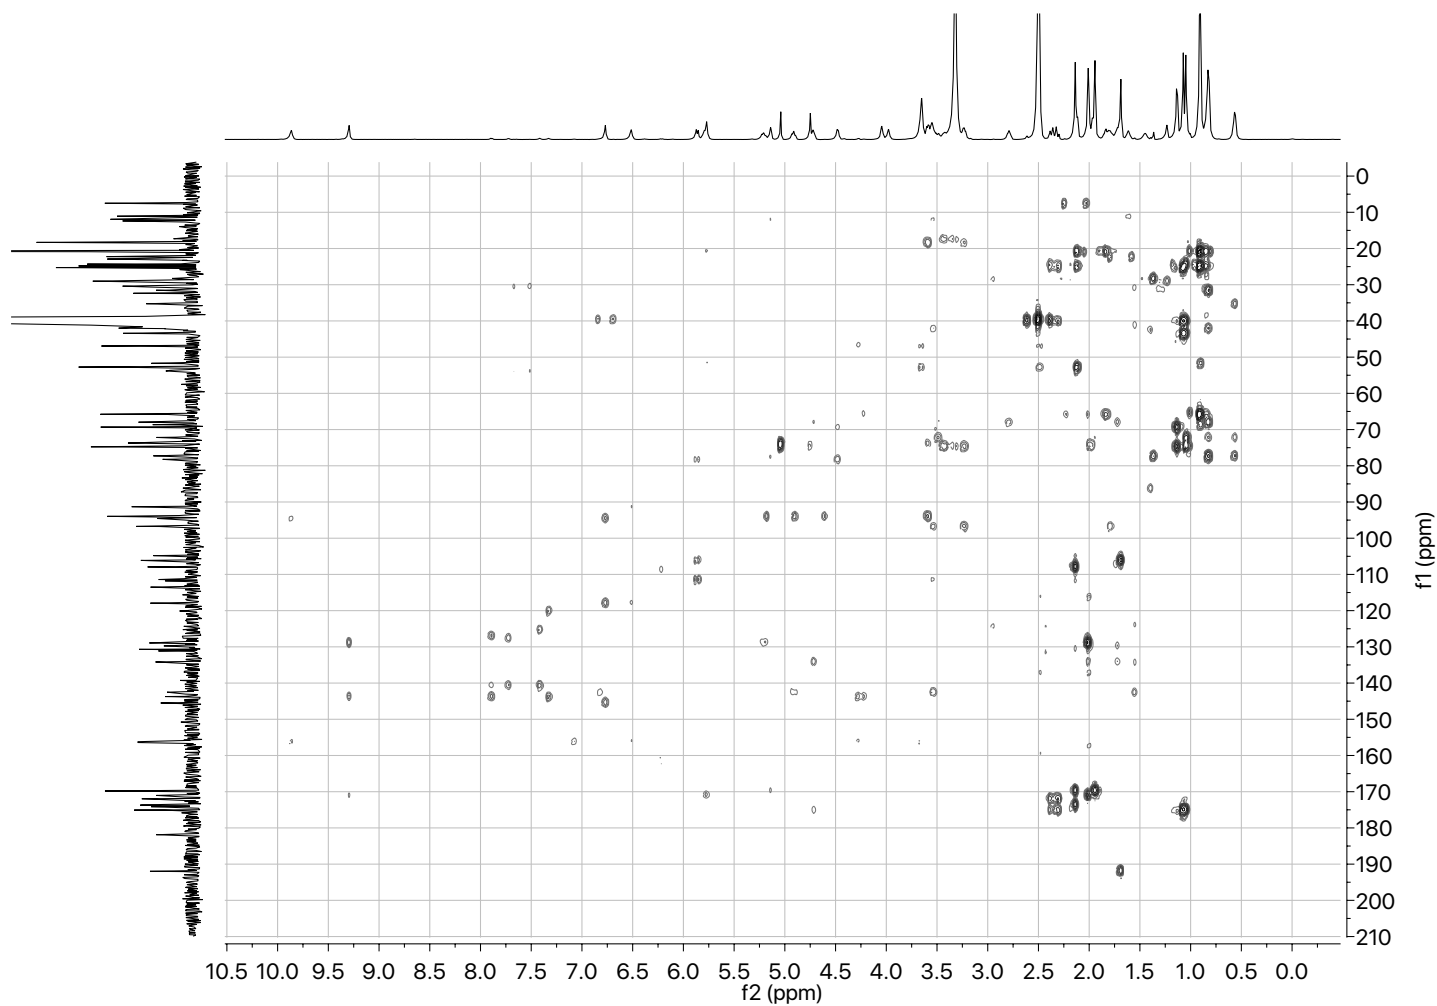

**Figure S26.** HMBC NMR spectrum of KZ in DMSO-d<sub>6</sub>.

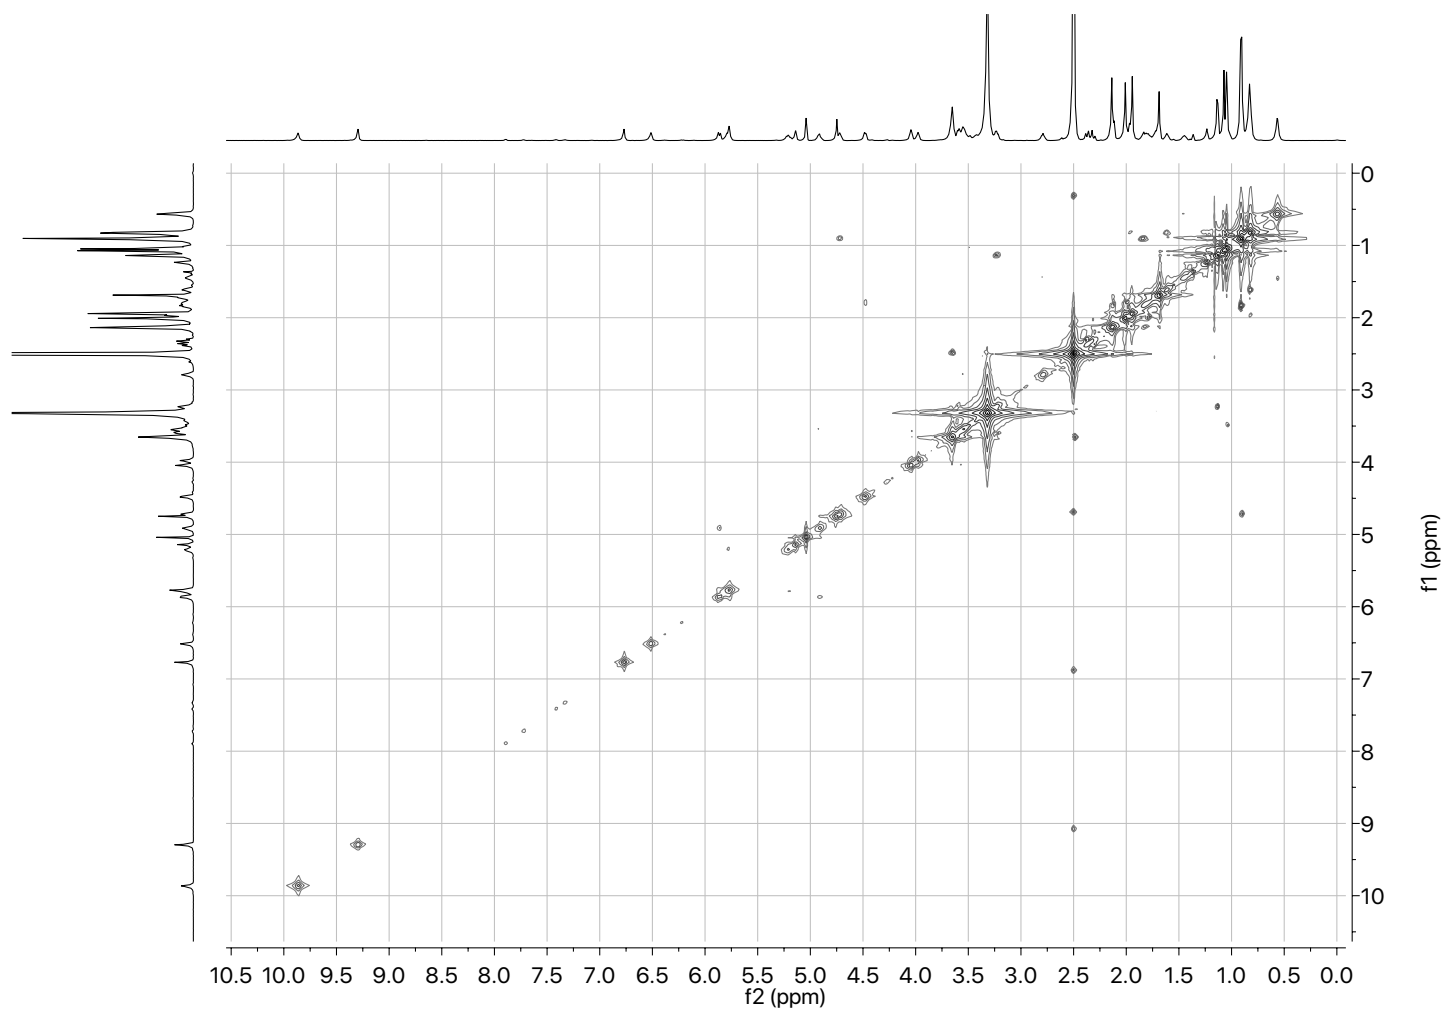

**Figure S27.** COSY NMR spectrum of KZ in DMSO-d<sub>6</sub>.
